# Supplementary material
Source: PubMed Central journal article supplement (PMC4362247)
Supplement: JCI76452sd.pdf [file JCI76452sd.pdf]

## **Wnt signalling promotes Cholangiocarcinoma growth and can be therapeutically targeted**

Luke Boulter, Rachel V Guest, Timothy J Kendall, David H Wilson, Davina Wojtacha, Andrew J Robson, Rachel A Ridgway, Kay Samuel, Nico Van Rooijen, Simon T Barry, Stephen J Wigmore, Owen J Sansom, Stuart J Forbes

### **Supplementary Material:**

Supplementary Figures 1-8

Supplementary Tables 1-6

### **Supplementary Figure 1: Further examples of Wnt ligand and target expression in human CC.**

(A) WNT7B (green)/CD68 (red) expression in human CC. (B) BIRC5, LEF1, CCND2, SOX9, C-MYC, CTNNB1 (red) and BCL9 (green) expression in human CC. White arrows denote co-localisation. Black arrows denote nuclear positivity. Scale bar 50µm.

### **Supplementary Figure 2: Cholangiocarcinoma evolves over time and incorporates bone marrow derived macrophages in its microenvironment.**

(A) Immunohistochemistry for DNA, Ctnnb1, Wnt7b and YFP, single channels from staining in Figure 2C. (B and C) Immunohistochemistry for c-MYC and CTNNB1 in non-tumour tissue in Kr19CreER<sup>T</sup>R26Rp53<sup>ff</sup> mice (D) Immunohistochemistry for Krt19 following onset of injury after 10 weeks of TAA through to 26 weeks. (E) Immunohistochemistry of rat cholangiocarcinoma, GFP (green), CD68 (white) and Wnt7b (red). Scale bar = 50um

### **Supplementary Figure 3: Macrophage loss inhibits xenografts growth**

(A) Immunohistochemistry for CSFR1 (red) in CC-LP-1, SNU-1079 and WITT1 xenografts and human CC. White arrows show positive staining (B) Immunohistochemistry for CD68 (red) in WITT1 xenografts treated with vehicle, lipclod, GW2580 and AZD7507. Dot-plot is quantified macrophage number. (C) Mass and volume of WITT1 xenografts treated with vehicle, lipclod, GW2580 and AZD7507 (D) Murine Wnt7b mRNA in WITT1 vehicle, lipclod, GW2580 and AZD7507 treated xenografts. (E) Human BIRC5, CCND2 and CCNE mRNA in SNU-1079 and CC-LP-1 xenografts following Lipclod, GW2580, AZD7507 or vehicle. (F) Ki67 in SNU-1079 and CC-LP-1 xenografts

following Lipclod, GW2580, AZD7507 or vehicle. (G) Human Bax1 mRNA in SNU-1079 and CC-LP-1 xenografts following Lipclod, GW2580, AZD7507 or vehicle. Photomicrograph, TUNEL stain in SNU-1079 and CC-LP-1 xenografts following Lipclod, GW2580, AZD7507 or vehicle. (H) Human BIRC5, CCND2, CCNE mRNA in WITT1 vehicle, lipclod, GW2580 and AZD7507 treated xenografts (I) Ki67 in WITT1 vehicle, lipclod, GW2580 and AZD7507 treated xenografts. (J) Human Bax1 mRNA in WITT1 vehicle, lipclod, GW2580 and AZD7507 treated xenografts. TUNEL in WITT1 vehicle, lipclod, GW2580 and AZD7507 treated xenografts. Kruskal Wallis tests compared GW2580, AZD7507 and control. Mann Whitney U tests compared Lipclod and control, \*P<0.05, \*\*P<0.01, \*\*\*P<0.001. Scale bar = 50µm. SNU-1079 N: PBS-11, Liposomes-8, Lipclod-8, Gavage vehicle-8, GW2580-4 and AZD7507-6. CC-LP-1 N: PBS-9, Liposomes-6, Lipclod-15, Gavage vehicle-6, GW2580-3 and AZD7507-3. WITT1 N: PBS-8, liposomal PBS-6, Lipclod-7, GW2580-7 and AZD7507-8. Scale bar = 50µm.

#### **Supplementary Figure 4: Macrophage depletion reduces canonical Wnt signalling in Cholangiocarcinoma**

(A) Immunohistochemistry of macrophages (CD68) and M2 Macrophages (CD163) in control vs lipclod depleted. Histograms: quantification of macrophage depletion (B) Immunohistochemistry for CTNNB1 (red), Krt19 (green), DNA (blue) in CC following treatment with liposomal clodronate of vehicle. White arrows denote nuclear positivity. Histogram represents quantification of biliary nuclear CTNNB1 staining in vehicle treated vs liposomal treated animals. (C-F) Immunohistochemistry for BIRC5, SOX9, LEF1 and CCND2(brown) in TAA CC following treatment with vehicle vs Lipclod (Black arrows denote; Yellow arrows negative epithelial cells). Graphs - Quantification of BIRC5, SOX9, LEF1, CCND2 positive epithelial cells positive epithelial cells in TAA CC following vehicle or Lipclod treatment (N=10 per group). (G) Immunohistochemistry for Ki67 (red) and TUNEL (green) following depletion of macrophages with Lipclod. Graphs - Quantification of Ki67 positive epithelial nuclei and TUNEL positive epithelial nuclei in the two groups (N=10 per group). Data is represented as a mean ± s.e.m. Data was compared with a Mann Whitney U test where \*p<0.05, \*\*p<0.01, \*\*\*p<0.001. Photomicrograph scale bar 50µm.

**Supplementary 5: Human CC lines express CTNNB1 and WNT7B and their growth is inhibited following Wnt inhibition.** (A) Immunocytochemistry for WNT7B (green) and CTNNB1 (red) in human CC cell lines SNU-1079, CC-SW-1, SNU-1196, CC-LP-1 and WITT-1. Example of negative staining for WNT7B in SNU-1196 in Supplementary Figure 8B.

**Supplementary Figure 6: Wnt signalling inhibition regulated CC cell proliferation**

(A) mRNA expression of Wnt signalling targets and cell cycle gene expression in SNU-1196, CC-SW-1 and WITT1 lines treated with ICG-001 vs vehicle. Green represents down regulated, red up regulated (B) mRNA expression of Wnt signalling targets and cell cycle gene expression in SNU-1196, CC-SW-1 and WITT1 lines treated with C-59 vs vehicle. Green represents down regulated, red up regulated (C, G, K) Volume and Mass of SNU-1079, CC-LP-1 and WITT1 treated with vehicle, ICG-001 and C-59. (D, H, L) murine Wnt7b expression in SNU-1079, CC-LP-1 and WITT1 treated with vehicle, ICG-001 and C-59. (E, I, M) BIRC5, CCND2 and CCNE in SNU-1079, CC-LP-1 and WITT1 treated with vehicle, ICG-001 and C-59. (F, J, N) BAX1 mRNA expression in SNU-1079, CC-LP-1 and WITT1 treated with vehicle, ICG-001 and C-59. WITT1 N: Vehicle-14, ICG-001-9 and C-59-6. CC-LP-1 N: Vehicle-16, ICG-001-8, C-59-11. SNU-1079: Vehicle-15, ICG-001-8, C-59-9. Data was compared with a Kruskal Wallis test where \* $p < 0.05$ , \*\* $p < 0.01$ , \*\*\* $p < 0.001$ .

**Supplementary Figure 7: No systemic effects of Wnt inhibition on TAA treated rats.**

(A) Body weights of TAA rats treated with vehicle, C-59, ICG-001 and lipclod. (B) Blood biochemistry of TAA rats treated with ICG-001 or C-59: AST, ALT, Albumin, Bilirubin, ALP. (C) mRNA expression of AurkA, AurkB and AurkC in TAA rats treated with vehicle, ICG-001 and C-59. Data is represented as a mean  $\pm$  s.e.m. \* $P < 0.05$ , \*\* $P < 0.01$ .

**Supplementary Figure 8: Positive and negative control for immunohistochemistry.**

(A) Immunohistochemistry for CTNNB1, RSPO-1, WNT7B, LEF-1, BIRC5, BCL-9, CCND2 in E11.5 Embryonic tissue and no primary antibody control. (B) SNU-1079, CC-SW-1, SNU-1196, CC-LP-1 and WITT-1 CC lines stained with secondary antibodies only. Scale bars represent 20 $\mu$ m

**Supplementary Table 1: Summary table of human tissues used in this study**

CC and non-diseased liver tissue. Age, at the time of surgical intervention. Histological classification and TNM score.

**Supplementary Table 2: Regulation of Wnt pathway and pathway targets in human CC compared to non-CC liver**

Human CC vs non-cancerous controls. Data is represented as fold-change and P-value.

**Supplementary Table 3: Wnt targets in rat TAA when treated with Liposomal Clodronate**

Rat TAA vs age-matched controls and Liposomal clodronate vs vehicle. Data is represented as fold-change and P-value.

**Supplementary Table 4: Wnt targets and cell cycle gene expression in human CC cells treated with ICG-001 and C-59**

Pooled gene expression data for SNU-1079, CC-LP-1, CC-SW-1, WITT1 and SNU-1196 treated with ICG-001 or C-59 vs vehicle. Gene expression represented as fold-change. UD represents genes which were below the detectable threshold in both samples

**Supplementary Table 5: Wnt targets in rat TAA rat when treated with C-59 or ICG001**

mRNA expression of Rat TAA induced CC treated with C-59 or ICG001 vs vehicle treated TAA liver alone data expressed as fold-change and P-value.

**Supplementary Table 6: Antibodies and Primers used in this study.**

Supplementary Figure 1:

Human

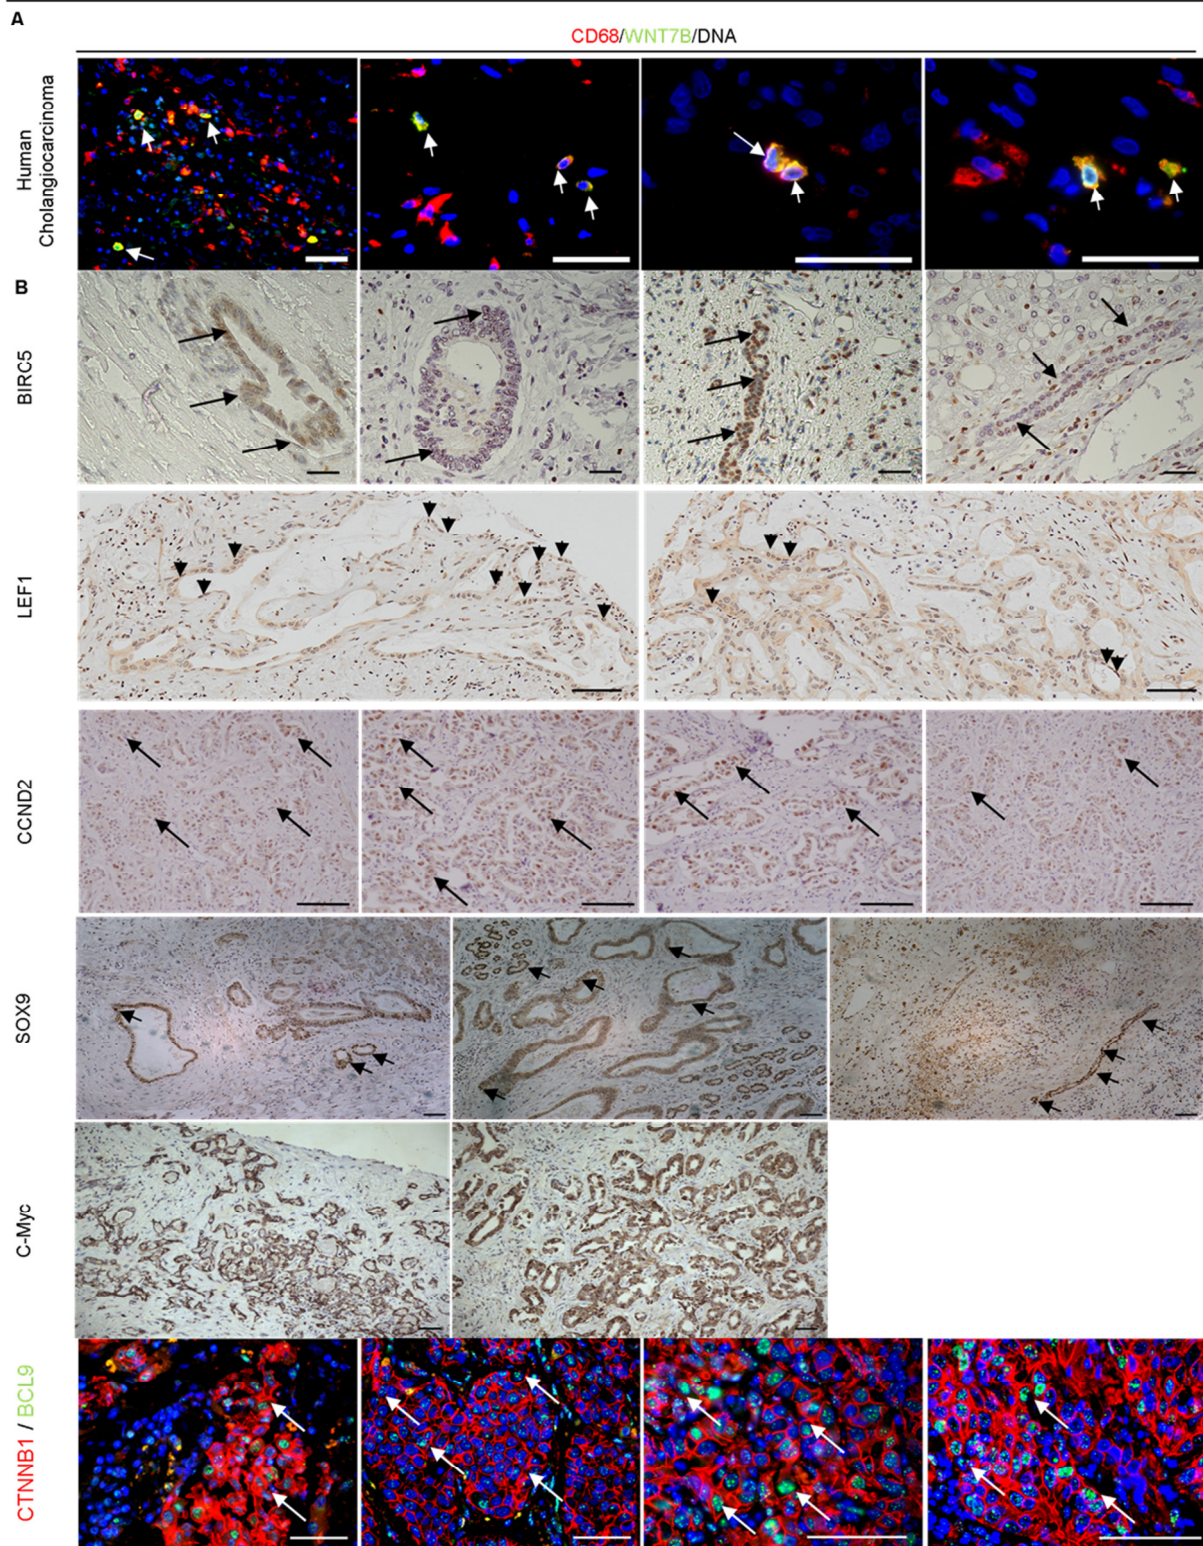

## Supplementary Figure 2

A

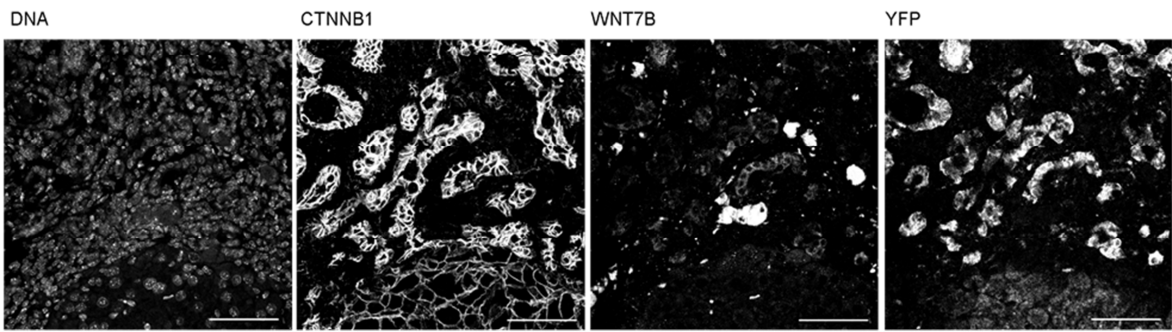

B

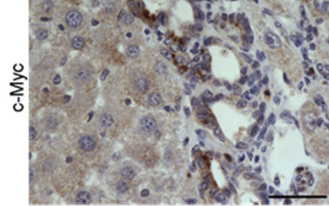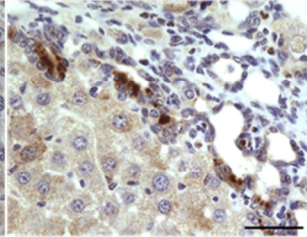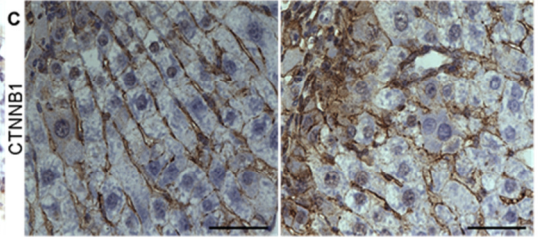

D

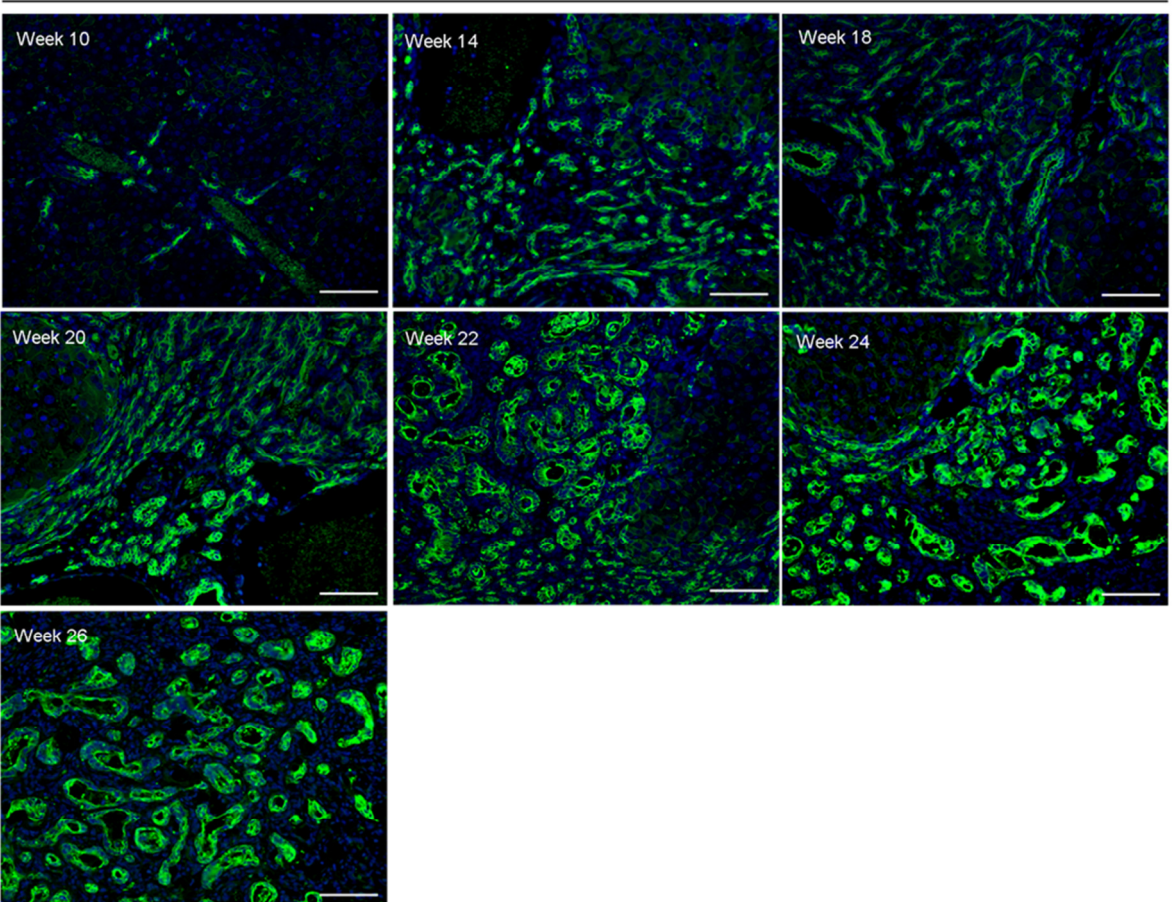

E

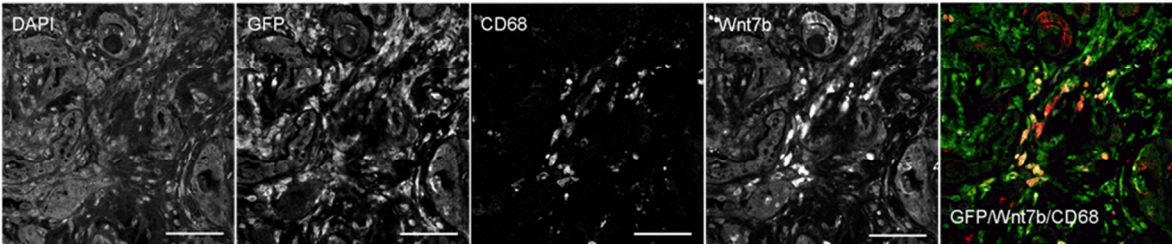

### Supplementary Figure 3:

A

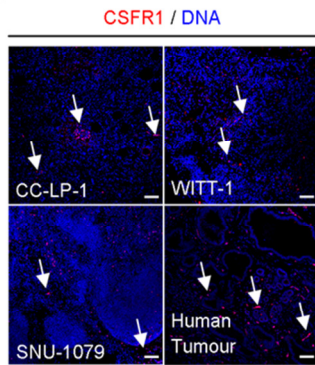

B

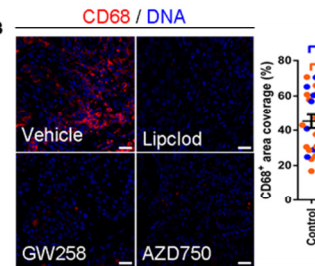

C

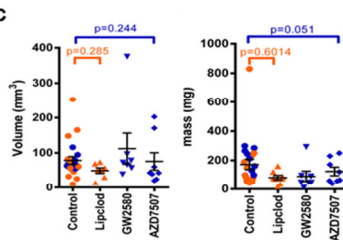

D

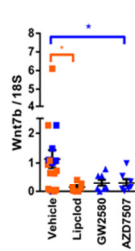

E

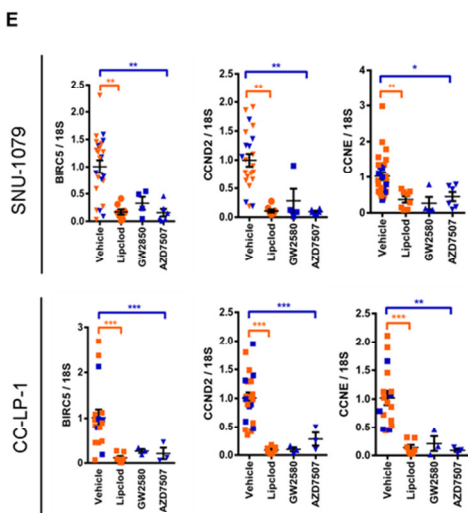

F

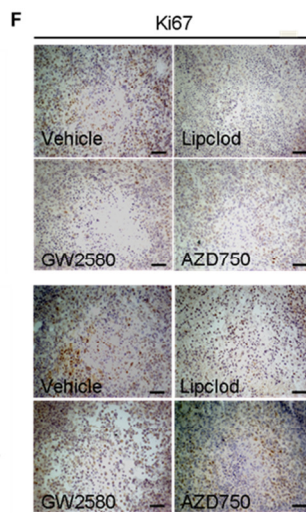

G

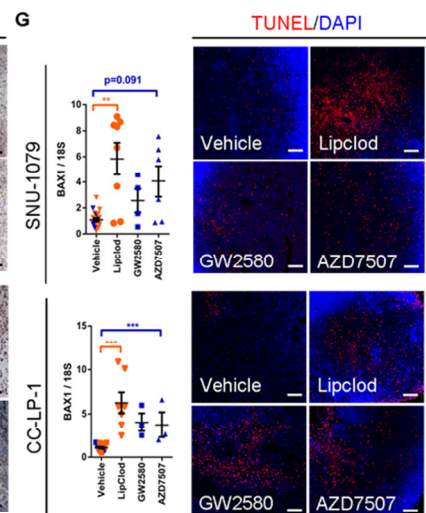

H

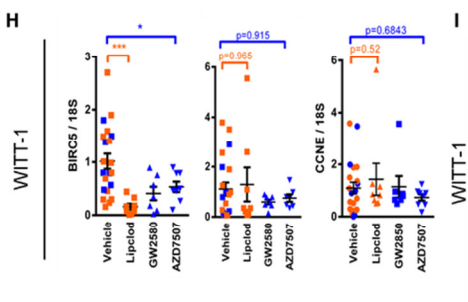

I

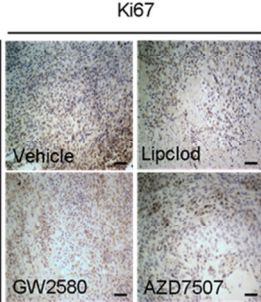

J

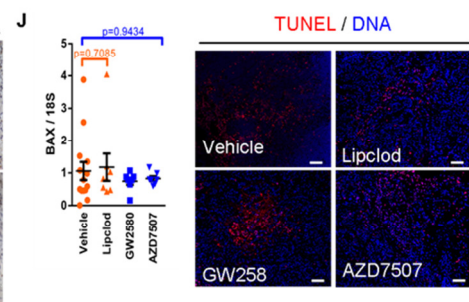

**Supplementary Figure 4:**

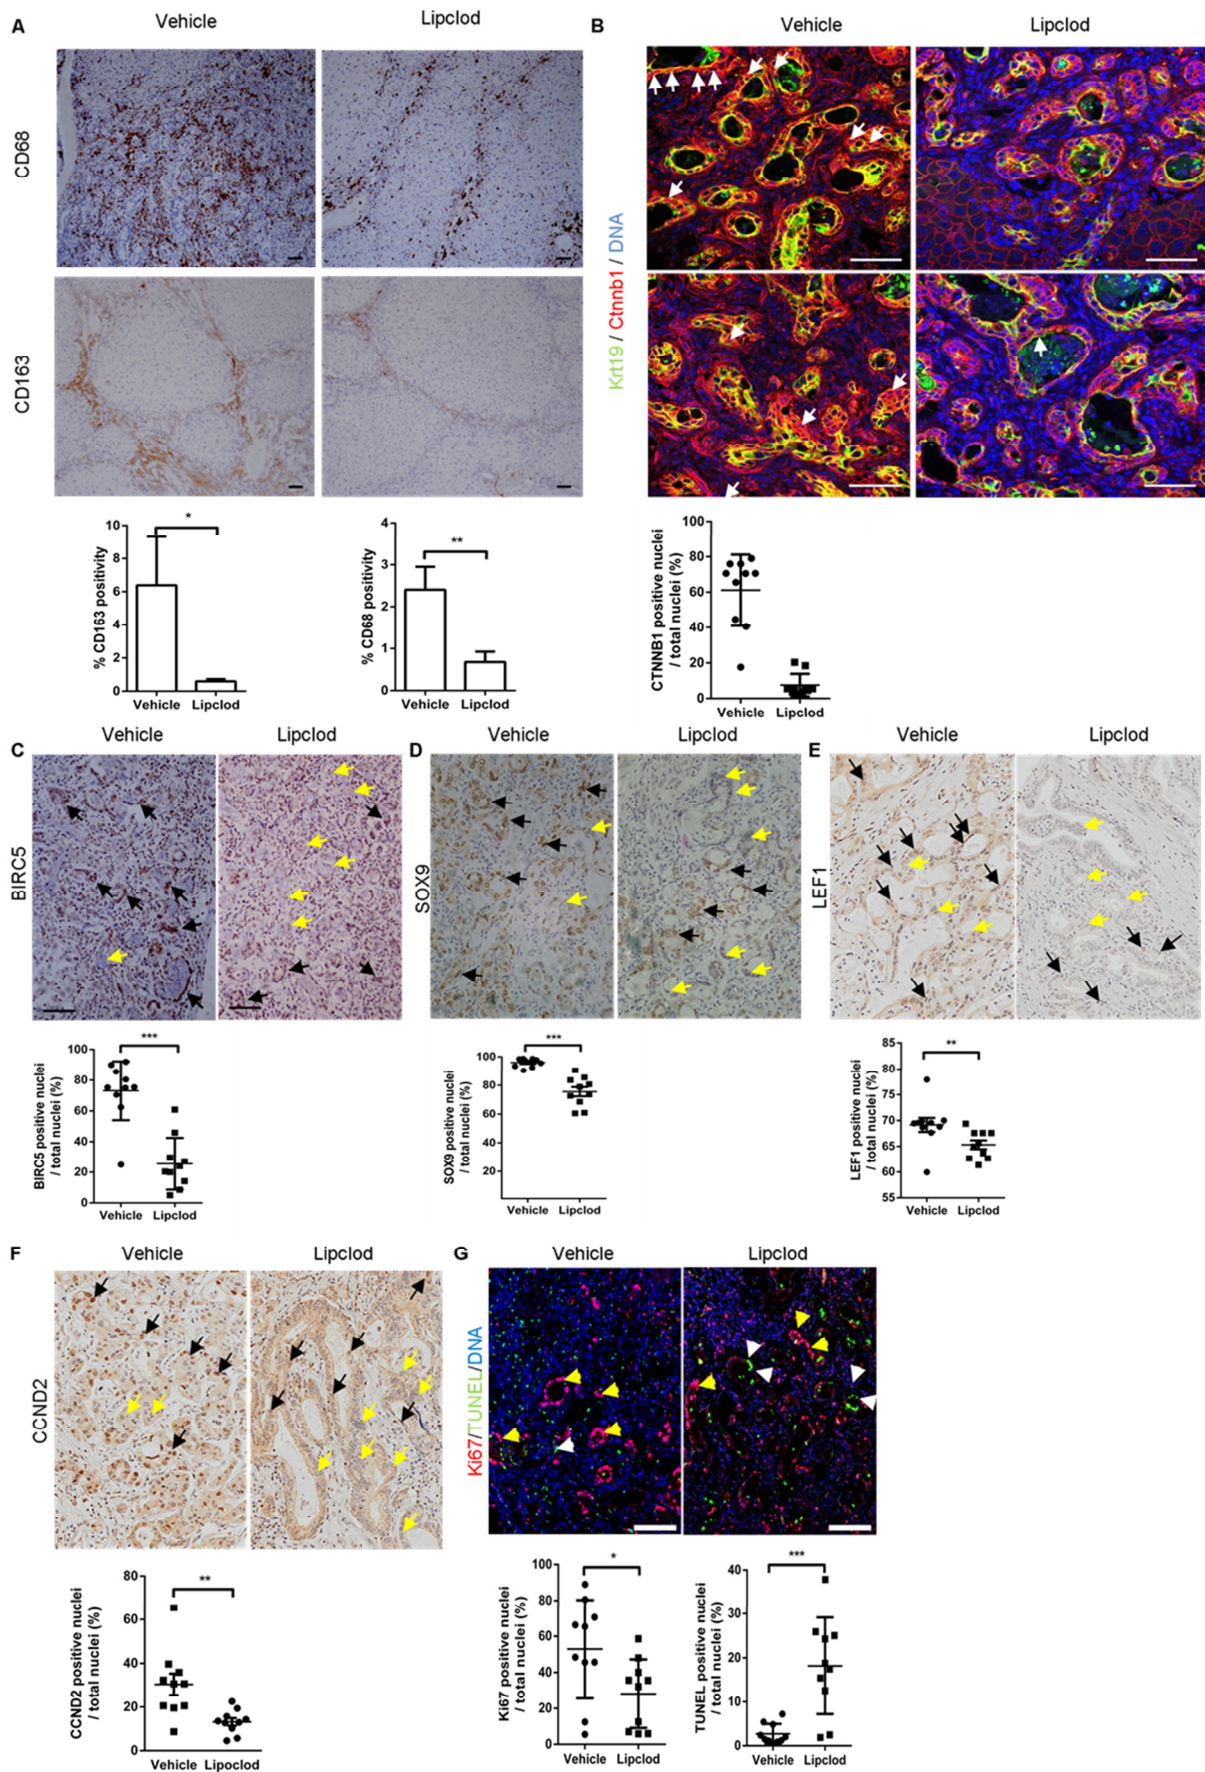



## Supplementary Figure 5

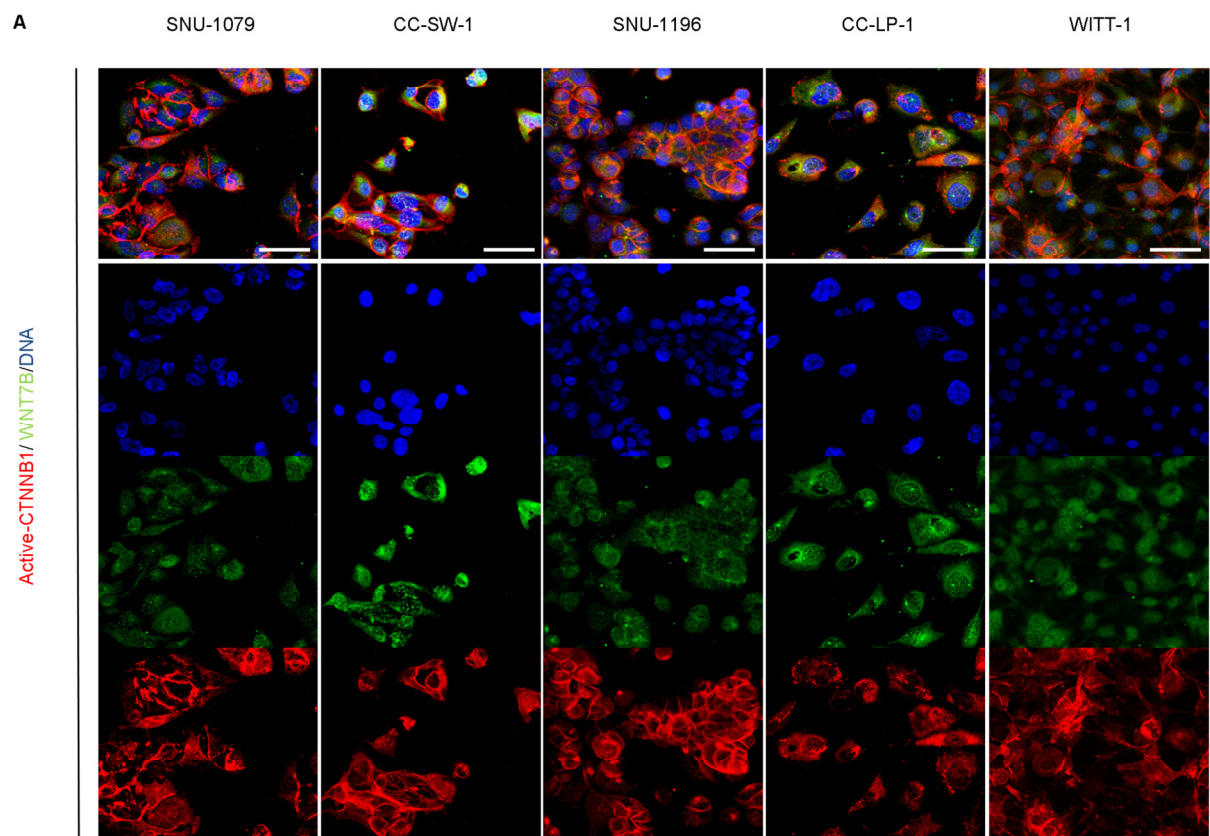

# Supplementary Figure 6

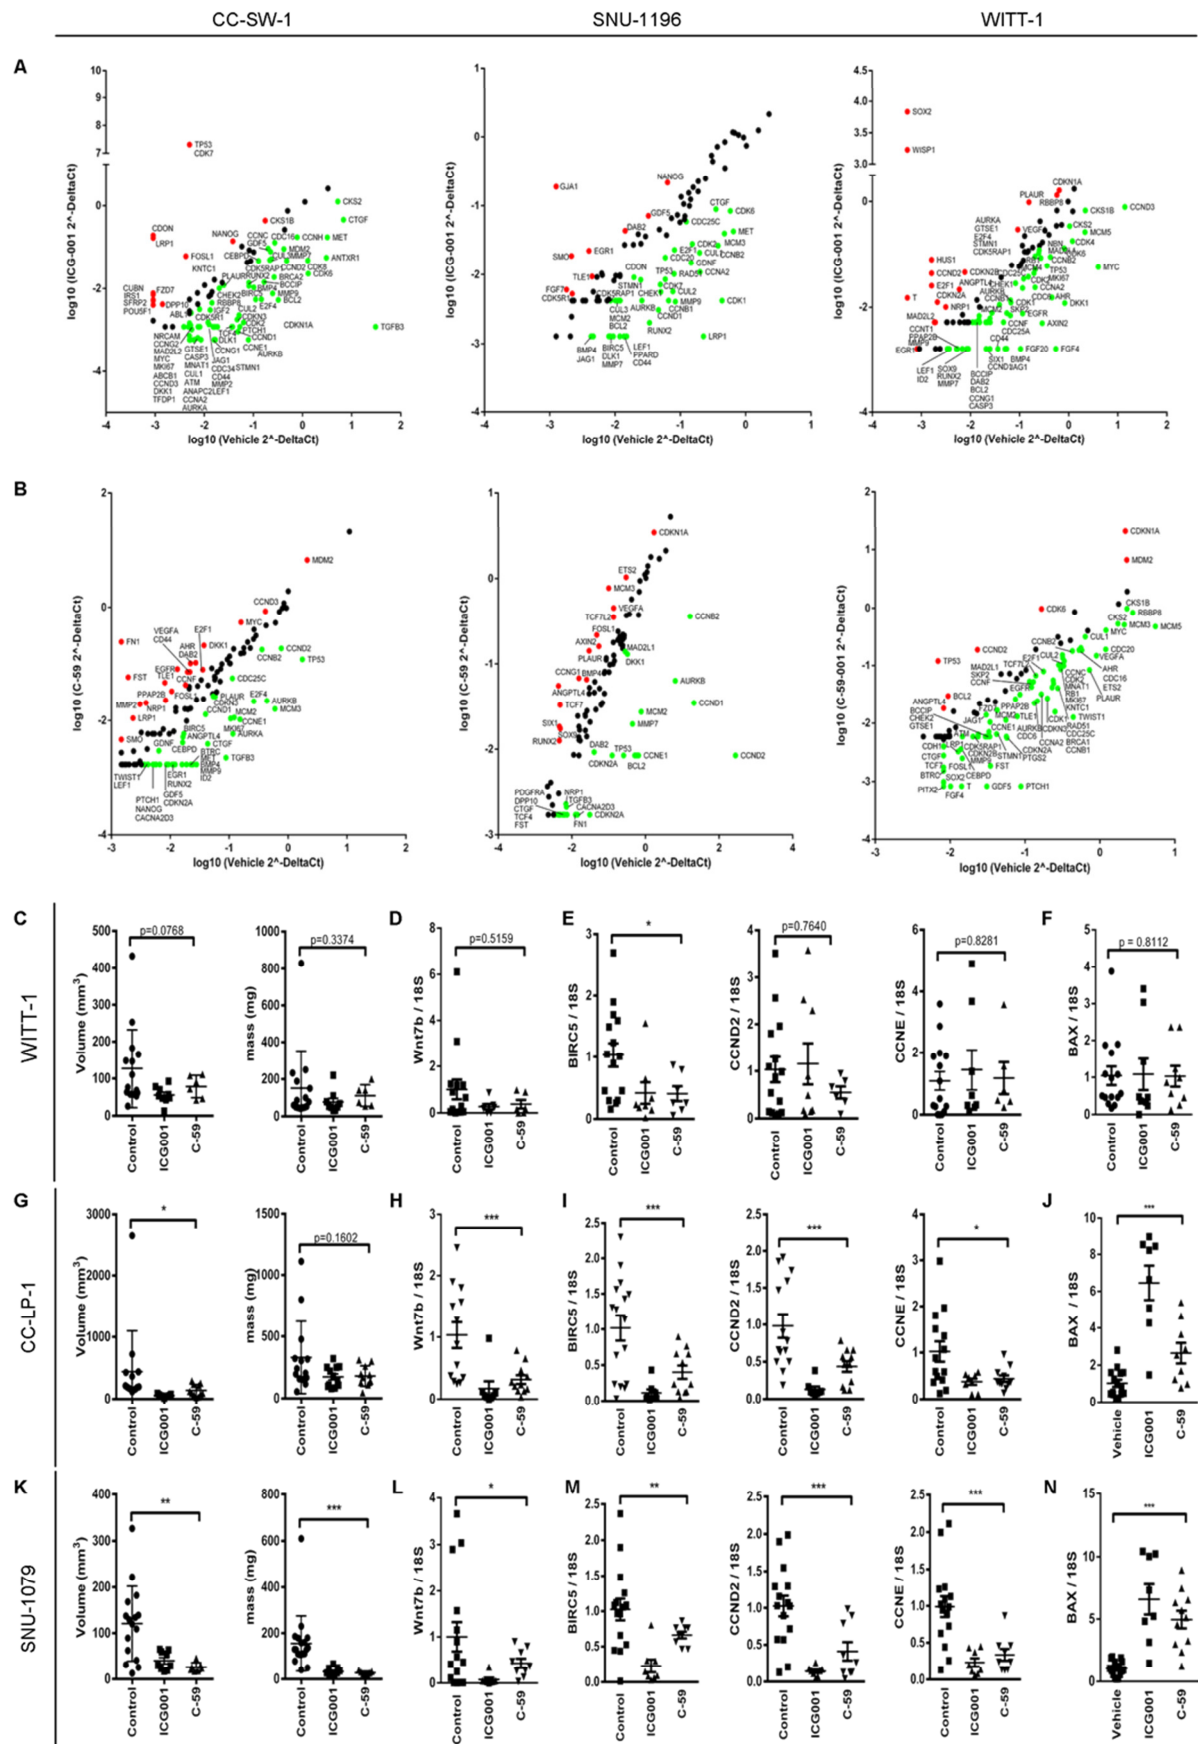

Supplementary Figure 7

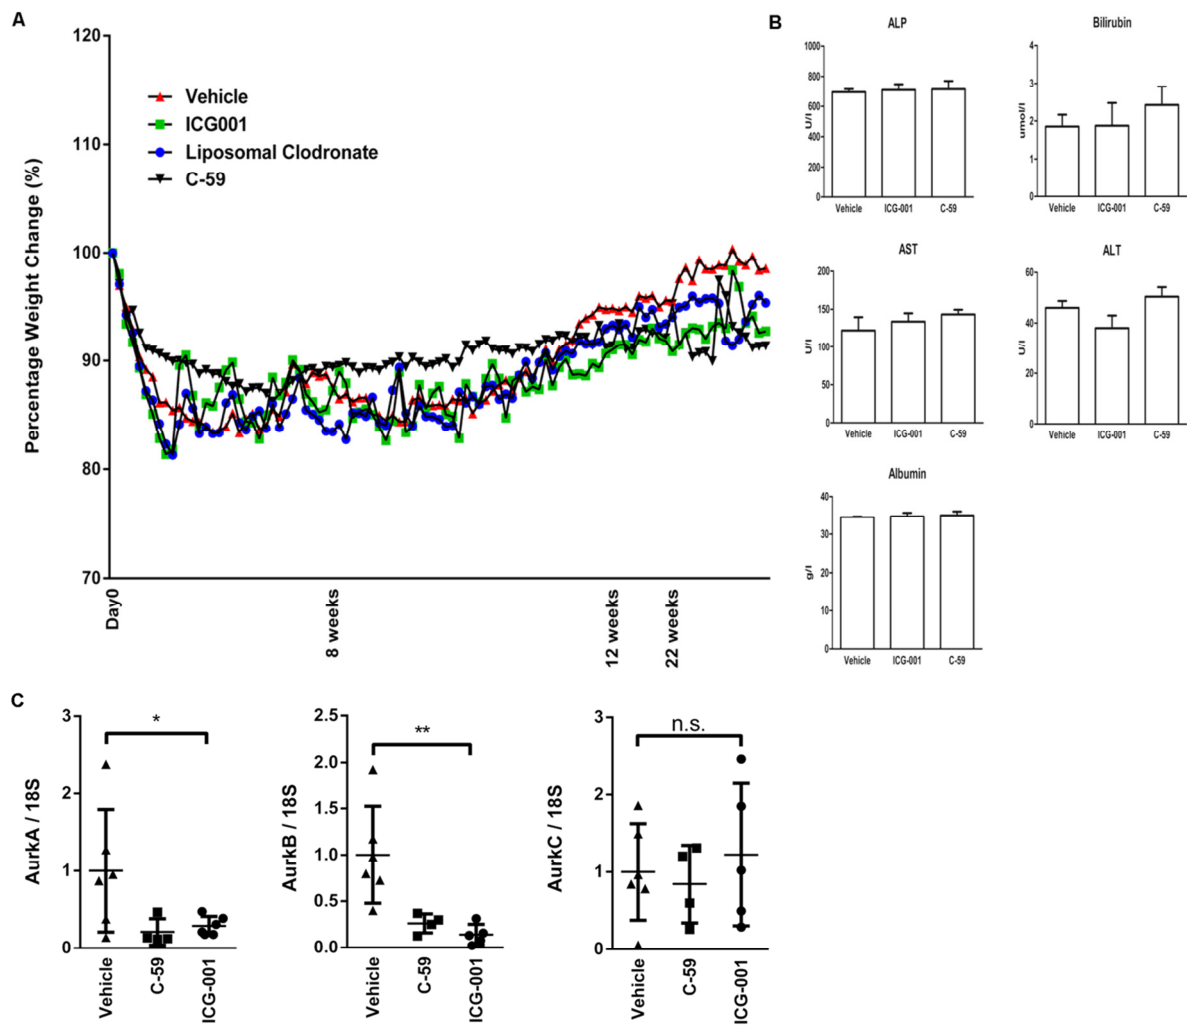

Supplementary Figure 8

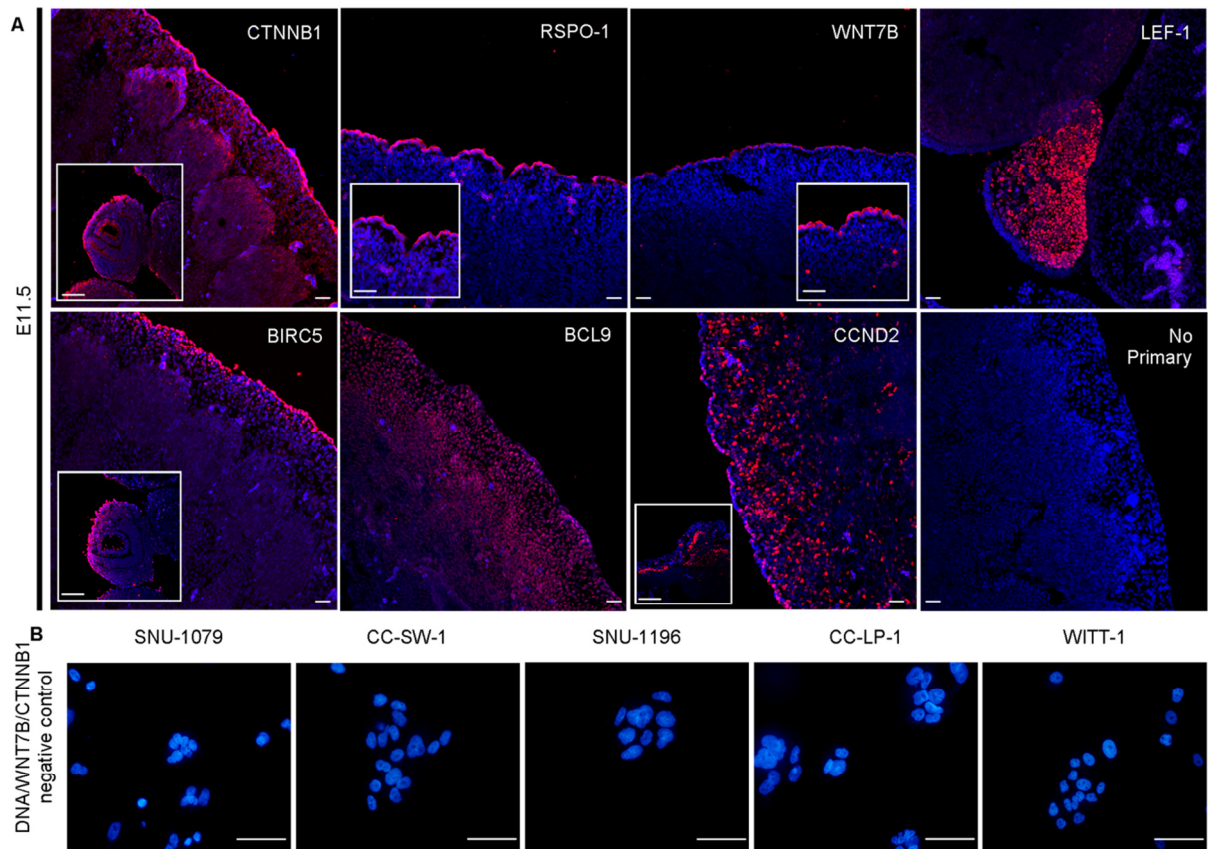

**Supplementary Table 1**

| Tissue source: The SAHSC BioResource and Tissue Governance Unit |     |     |                      |                               |                 |                         |                         |                          |                   |                |                     |                          |                           |
|-----------------------------------------------------------------|-----|-----|----------------------|-------------------------------|-----------------|-------------------------|-------------------------|--------------------------|-------------------|----------------|---------------------|--------------------------|---------------------------|
| Case #                                                          | Age | Sex | Site (UICC/AJCC TNM) | Histiotype                    | Differentiation | Pattern                 | Stage (UICC/AJCC TNM 7) | Size (max dimension, mm) | Vascular invasion | LN involvement | Perineural invasion | Completeness of excision | Underlying disease        |
| 1                                                               | 67  | F   | Perihilar            | Adenocarcinoma                | Poor            | Mass forming            | pT2b N2                 | 31                       | Y                 | Y              | Y                   | Incomplete               | N                         |
| 2                                                               | 60  | M   | Perihilar            | Adenocarcinoma                | Well            | Periductal infiltrating | pT2b N0                 | 18                       | Y                 | N              | Y                   | Complete                 | N                         |
| 3                                                               | 61  | M   | Perihilar            | Adenocarcinoma                | Moderate        | Periductal infiltrating | pT2b N1                 | 18                       | N                 | Y              | N                   | Incomplete               | N                         |
| 4                                                               | 52  | F   | Perihilar            | Adenocarcinoma                | Well            | Mass forming            | pT2b N0                 | 23                       | N                 | N              | Y                   | Complete                 | N                         |
| 5                                                               | 83  | F   | Perihilar            | Adenocarcinoma                | Well            | Periductal infiltrating | pT2a N0                 | 18                       | N                 | N              | N                   | Complete                 | N                         |
| 6                                                               | 51  | F   | Perihilar            | Adenocarcinoma                | Moderate        | Periductal infiltrating | pT2b N1                 | 38                       | N                 | Y              | Y                   | Incomplete               | N                         |
| 7                                                               | 67  | F   | Perihilar            | Adenocarcinoma                | Poor            | Periductal infiltrating | pT2b N0                 | 25                       | Y                 | N              | Y                   | Complete                 | N                         |
| 8                                                               | 83  | F   | Perihilar            | Adenocarcinoma                | Poor            | Periductal infiltrating | pT2b N1                 | 20                       |                   | Y              | Y                   | Complete                 | N                         |
| 9                                                               | 87  | F   | Intrahepatic         | Adenocarcinoma                | Moderate        | Mass forming            | pT1 N0                  | 53                       | N                 | N              | N                   | Complete                 | N                         |
| 10                                                              | 39  | F   | Perihilar            | Adenocarcinoma                | Poor            | Periductal infiltrating | pT2a N0                 |                          | N                 | N              | Y                   | Complete                 | N                         |
| 11                                                              | 71  | M   | Intrahepatic         | Adenocarcinoma                | Poor            | Mass forming            | pT3 N0                  | 62                       | Y                 | N              | N                   | Complete                 | N                         |
| 12                                                              | 68  | M   | Perihilar            | Adenocarcinoma                | Well            | Periductal infiltrating | pT2b N0                 |                          | N                 | N              | Y                   | Complete                 | N                         |
| 13                                                              | 49  | M   | Perihilar            | Adenocarcinoma                | Moderate        | Periductal infiltrating | pT2a N1                 | 30                       | N                 | Y              | Y                   | Incomplete               | N                         |
| 14                                                              | 82  | M   | Perihilar            | Adenocarcinoma                | Well            | Periductal infiltrating | pT2b N1                 | 22                       | N                 | Y              | Y                   | Complete                 | N                         |
| 15                                                              | 79  | M   | Perihilar            | Adenocarcinoma                | Well            | Intraductal             | pT2a N0                 | 32                       | N                 | N              | Y                   | Complete                 | N                         |
| 16                                                              | 59  | F   | Perihilar            | Adenocarcinoma                | Moderate        | Periductal infiltrating | pT2b N1                 | 56                       | N                 | Y              | Y                   | Incomplete               | N                         |
| 17                                                              | 75  | M   | Perihilar            | Adenocarcinoma                | Moderate        | Periductal infiltrating | pT2a N1                 | 34                       | N                 | Y              | N                   | Complete                 | N                         |
| 18                                                              | 50  | M   | Intrahepatic         | Adenocarcinoma                | Poor            | Periductal infiltrating | pT3 No                  |                          | N                 | N              | Y                   | Incomplete               | N                         |
| 19                                                              | 72  | F   | Intrahepatic         | Cholangiolocellular carcinoma | Well            | Mass forming            | pT2b N0                 | 36, + 3 smaller          | N                 | N              | N                   | Complete                 | PBC/immune cholangiopathy |
| 20                                                              | 68  | F   | Perihilar            | Adenocarcinoma                | Moderate        | Periductal infiltrating | pT1 N0                  | 63                       | N                 | N              | N                   | Complete                 | N                         |
| 21                                                              | 57  | F   | Intrahepatic         | Adenocarcinoma                | Moderate        | Mass forming            | pT1 N0                  | 32                       | N                 | N              | N                   | Complete                 | N                         |
| 22                                                              | 61  | F   | Perihilar            | Adenocarcinoma                | No Ca in block  | Periductal infiltrating | pT2a N0                 | 13                       | N                 | N              | N                   | Incomplete               | N                         |
| 23                                                              | 62  | F   | Perihilar            | Adenocarcinoma                | Moderate        | Periductal infiltrating | pT2b N1                 | 75                       | N                 | Y              | Y                   | Complete                 | N                         |

**Supplementary Table 1**

|    |    |   |              |                |          |                         |         |                      |   |   |   |            |    |
|----|----|---|--------------|----------------|----------|-------------------------|---------|----------------------|---|---|---|------------|----|
| 24 | 74 | F | Perihilar    | Adenocarcinoma | Moderate | Periductal infiltrating | pT2a N2 |                      | N | N | N | Complete   | N  |
| 25 | 59 | M | Intrahepatic | Adenocarcinoma | Moderate | Mass forming            | pT2b N0 | Multiple recurrences | N | N | N | Complete   | N  |
| 26 | 69 | F | Intrahepatic | adenocarcinoma | Well     | Mass forming            | pT2a N0 | 26                   | Y | N | N | Complete   | N  |
| 27 | 60 | F | Intrahepatic | Adenocarcinoma | Moderate | Mass forming            | pT3 N0  | 95                   | Y | N | N | Complete   | N  |
| 28 | 27 | F | Perihilar    | Adenocarcinoma | Moderate | Periductal infiltrating | pT2a N0 |                      | N | N | Y | Incomplete | N  |
| 29 | 74 | F | Perihilar    | Adenocarcinoma | Moderate | Mass forming            | pT2b N0 | 67                   | N | N | N | Incomplete | N  |
| 30 | 71 | M | Perihilar    | Adenocarcinoma | Moderate | Mass forming            | pT2b N0 | 62                   | Y | N | N | Incomplete | N  |
| 31 | 45 | M | Perihilar    | Adenocarcinoma | Moderate | Periductal infiltrating | pT1 N0  | 2.5                  | N | N | N | Complete   | N  |
| 32 | 62 | F | Perihilar    | Adenocarcinoma | Moderate | Mass forming            | pT2b N1 | 75                   | N | Y | Y | Complete   | UC |
| 33 | 62 | F | Intrahepatic | Adenocarcinoma | Moderate | Mass forming            | pT1 N0  | 78                   | N | N | N | Complete   | N  |
| 36 | 57 | M | Perihilar    | Adenocarcinoma | Moderate | Periductal infiltrating | pT2a N0 | 32                   | N | N | Y | Complete   | N  |
| 37 | 52 | F | Perihilar    | Adenocarcinoma | Well     | Periductal infiltrating | pT2b N0 | 23                   | N | N | Y | Complete   | N  |

**Supplementary Table 1**

| Tissue source: NRS BioResource, Edinburgh |     |     |                     |
|-------------------------------------------|-----|-----|---------------------|
| Case #                                    | Age | Sex | Diagnosis           |
| 1                                         | 47  | M   | 15% macro steatosis |
| 2                                         | 45  | F   |                     |
| 3                                         | 60  | M   |                     |
| 4                                         | 63  | M   |                     |
| 5                                         | 51  | M   |                     |
| 6                                         | 54  | M   |                     |
| 7                                         | 50  | M   |                     |
| 8                                         | 70  | M   | 20% macro steatosis |
| 9                                         | 48  | M   |                     |
| 10                                        | 42  | M   |                     |
| 11                                        | 48  | M   | 40% macro steatosis |
| 12                                        | 58  | M   |                     |
| 13                                        | 30  | M   |                     |
| 14                                        | 42  | F   |                     |
| 15                                        | 66  | M   |                     |
| 16                                        | 36  | M   |                     |
| 17                                        | 39  | M   |                     |
| 18                                        | 66  | M   |                     |
| 19                                        | 50  | F   |                     |
| 20                                        | 58  | M   |                     |
| 21                                        | 53  | M   |                     |
| 22                                        | 63  | M   |                     |
| 23                                        | 49  | M   |                     |
| 24                                        | 57  | M   | 20% macro steatosis |
| 25                                        | 43  | M   | 15% macro steatosis |
| 26                                        | 48  | M   |                     |
| 27                                        | 52  | M   |                     |
| 28                                        | 51  | M   |                     |
| 29                                        | 43  | M   |                     |

| Tissue source: Pantomics Inc., California TMA LV1261 |     |     |               |                    |        |        |
|------------------------------------------------------|-----|-----|---------------|--------------------|--------|--------|
| Case #                                               | Sex | Age | Anatomic Site | Pathology          | Grade  | Stage  |
| 1                                                    | F   | 78  | Liver         | Cholangiocarcinoma | I      | T4N1M0 |
| 2                                                    | M   | 65  | Liver         | Cholangiocarcinoma | II     | T2N0M0 |
| 3                                                    | M   | 52  | Liver         | Cholangiocarcinoma | I      | T2N0M0 |
| 4                                                    | F   | 50  | Liver         | Cholangiocarcinoma | II     | T3N1M0 |
| 5                                                    | M   | 78  | Liver         | Cholangiocarcinoma | II     | T4N1M0 |
| 6                                                    | M   | 82  | Liver         | Cholangiocarcinoma | III    | T2N0M0 |
| 7                                                    | F   | 75  | Liver         | Cholangiocarcinoma | II     | T2N0M0 |
| 8                                                    | F   | 50  | Liver         | Cholangiocarcinoma | II     | T2N0M0 |
| 9                                                    | M   | 59  | Liver         | Cholangiocarcinoma | II     | T2N0M0 |
| 10                                                   | F   | 70  | Liver         | Cholangiocarcinoma | II     | T2N0M0 |
| 11                                                   | M   | 40  | Liver         | Cholangiocarcinoma | II     | T2N0M0 |
| 12                                                   | M   | 34  | Liver         | Cholangiocarcinoma | II     | T2N0M0 |
| 13                                                   | M   | 60  | Liver         | Cholangiocarcinoma | II     | T2N1M0 |
| 14                                                   | M   | 55  | Liver         | Cholangiocarcinoma | II     | T2N0M0 |
| 15                                                   | M   | 70  | Liver         | Cholangiocarcinoma | II     | T3N1M0 |
| 16                                                   | F   | 65  | Liver         | Cholangiocarcinoma | II     | T2N0M0 |
| 17                                                   | M   | 77  | Liver         | Cholangiocarcinoma | II     | T4N0M1 |
| 18                                                   | M   | 54  | Liver         | Cholangiocarcinoma | II     | T3N1M0 |
| 19                                                   | M   | 56  | Liver         | Cholangiocarcinoma | II     | T3N0M0 |
| 20                                                   | M   | 58  | Liver         | Cholangiocarcinoma | II     | T3N1M0 |
| 21                                                   | M   | 55  | Liver         | Cholangiocarcinoma | II     | T4N0M0 |
| 22                                                   | M   | 83  | Liver         | Cholangiocarcinoma | II     | T3N0M0 |
| 23                                                   | M   | 56  | Liver         | Cholangiocarcinoma | II     | T3N0M0 |
| 24                                                   | F   | 25  | Liver         | Cholangiocarcinoma | II     | T3N0M0 |
| 25                                                   | M   | 62  | Liver         | Cholangiocarcinoma | I      | T2N0M0 |
| 26                                                   | F   | 57  | Liver         | Cholangiocarcinoma | II     | T2N1M0 |
| 27                                                   | M   | 53  | Liver         | Cholangiocarcinoma | II     | T3N0M0 |
| 28                                                   | M   | 72  | Liver         | Cholangiocarcinoma | II     | T2N0M0 |
| 29                                                   | M   | 55  | Liver         | Cholangiocarcinoma | III    | T2N0M0 |
| 30                                                   | M   | 41  | Liver         | Cholangiocarcinoma | II~III | T4N0M0 |
| 31                                                   | M   | 70  | Liver         | Cholangiocarcinoma | II~III | T2N0M0 |
| 32                                                   | F   | 50  | Liver         | Cholangiocarcinoma | III    | T3N0M0 |
| 33                                                   | F   | 75  | Liver         | Cholangiocarcinoma | II~III | T2N0M0 |
| 34                                                   | M   | 78  | Liver         | Cholangiocarcinoma | II     | T2N1M0 |

**Supplementary Table 1**

|    |   |    |       |                    |        |        |
|----|---|----|-------|--------------------|--------|--------|
| 35 | F | 50 | Liver | Cholangiocarcinoma | II     | T3N1M0 |
| 36 | F | 51 | Liver | Cholangiocarcinoma | II     | T3N0M0 |
| 37 | F | 80 | Liver | Cholangiocarcinoma | II     | T3N0M0 |
| 38 | F | 66 | Liver | Cholangiocarcinoma | II~III | T3N0M0 |
| 39 | M | 70 | Liver | Cholangiocarcinoma | II~III | T3N0M0 |
| 40 | F | 82 | Liver | Cholangiocarcinoma | III    | T4N0M0 |
| 41 | M | 65 | Liver | Cholangiocarcinoma | III    | T2N0M0 |

| <b>Tissue source: Pantomics Inc., California TMA LV1261</b> |            |            |                      |                         |
|-------------------------------------------------------------|------------|------------|----------------------|-------------------------|
| <b>Case #</b>                                               | <b>Sex</b> | <b>Age</b> | <b>Anatomic Site</b> | <b>Pathology</b>        |
| 1                                                           | M          | 55         | Liver                | Uninvolved liver tissue |
| 2                                                           | M          | 41         | Liver                | Uninvolved liver tissue |
| 3                                                           | M          | 70         | Liver                | Uninvolved liver tissue |
| 4                                                           | F          | 50         | Liver                | Uninvolved liver tissue |
| 5                                                           | F          | 75         | Liver                | Uninvolved liver tissue |
| 6                                                           | M          | 78         | Liver                | Uninvolved liver tissue |
| 7                                                           | F          | 50         | Liver                | Uninvolved liver tissue |
| 8                                                           | F          | 51         | Liver                | Uninvolved liver tissue |
| 9                                                           | F          | 80         | Liver                | Uninvolved liver tissue |
| 10                                                          | F          | 66         | Liver                | Uninvolved liver tissue |
| 11                                                          | M          | 70         | Liver                | Uninvolved liver tissue |
| 12                                                          | F          | 82         | Liver                | Uninvolved liver tissue |
| 13                                                          | M          | 65         | Liver                | Uninvolved liver tissue |
| 14                                                          | F          | 53         | Liver                | Uninvolved liver tissue |
| 15                                                          | F          | 78         | Liver                | Uninvolved liver tissue |
| 16                                                          | M          | 65         | Liver                | Uninvolved liver tissue |
| 17                                                          | M          | 52         | Liver                | Uninvolved liver tissue |
| 18                                                          | F          | 50         | Liver                | Uninvolved liver tissue |
| 19                                                          | M          | 78         | Liver                | Uninvolved liver tissue |
| 20                                                          | M          | 82         | Liver                | Uninvolved liver tissue |
| 21                                                          | F          | 75         | Liver                | Uninvolved liver tissue |
| 22                                                          | F          | 50         | Liver                | Uninvolved liver tissue |
| 23                                                          | M          | 59         | Liver                | Uninvolved liver tissue |
| 24                                                          | F          | 70         | Liver                | Uninvolved liver tissue |
| 25                                                          | M          | 40         | Liver                | Uninvolved liver tissue |
| 26                                                          | M          | 34         | Liver                | Uninvolved liver tissue |
| 27                                                          | M          | 60         | Liver                | Uninvolved liver tissue |
| 28                                                          | M          | 55         | Liver                | Uninvolved liver tissue |



**Supplementary Table 1**

|    |   |    |       |                         |
|----|---|----|-------|-------------------------|
| 29 | M | 70 | Liver | Uninvolved liver tissue |
| 30 | F | 65 | Liver | Uninvolved liver tissue |
| 31 | M | 77 | Liver | Uninvolved liver tissue |
| 32 | M | 54 | Liver | Uninvolved liver tissue |
| 33 | M | 56 | Liver | Uninvolved liver tissue |
| 34 | M | 58 | Liver | Uninvolved liver tissue |
| 35 | M | 55 | Liver | Uninvolved liver tissue |
| 36 | M | 83 | Liver | Uninvolved liver tissue |
| 37 | M | 56 | Liver | Uninvolved liver tissue |
| 38 | F | 25 | Liver | Uninvolved liver tissue |
| 39 | M | 62 | Liver | Uninvolved liver tissue |
| 40 | F | 57 | Liver | Uninvolved liver tissue |
| 41 | M | 53 | Liver | Uninvolved liver tissue |

**Supplementary Table 2**

| <b>Unigene</b> | <b>Refseq</b> | <b>Symbol</b> | <b>Fold Change</b> | <b>P value</b> |
|----------------|---------------|---------------|--------------------|----------------|
| Hs.489033      | NM_000927     | ABCB1         | 0.1747             | 0.421629       |
| Hs.515053      | NM_001130     | AES           | 1.7399             | 0.748083       |
| Hs.171189      | NM_001621     | AHR           | 0.6613             | 0.704241       |
| Hs.9613        | NM_001039667  | ANGPTL4       | 0.3912             | 0.070093       |
| Hs.165859      | NM_018153     | ANTXR1        | 3.9816             | 0.016173       |
| Hs.158932      | NM_000038     | APC           | 0.6018             | 0.342147       |
| Hs.592082      | NM_003502     | AXIN1         | 1.7239             | 0.373732       |
| Hs.415209      | NM_004326     | AXIN2         | 1.8498             | 0.395939       |
| Hs.643802      | NM_033637     | BCL9          | 1391.4114          | 0.035304       |
| Hs.654541      | NM_199173     | BGLAP         | 0.5311             | 0.34666        |
| Hs.728893      | NM_001168     | BIRC5         | 3.6353             | 0.108203       |
| Hs.68879       | NM_130851     | BMP4          | 5.0092             | 0.121109       |
| Hs.523852      | NM_053056     | BTRC          | 1.1911             | 0.669192       |
| Hs.643802      | NM_033637     | BTRC          | 0.5551             | 0.335792       |
| Hs.656687      | NM_018398     | CACNA2D3      | 2.2632             | 0.505006       |
| Hs.376071      | NM_001759     | CCND1         | 89.926             | 0.142662       |
| Hs.534307      | NM_001760     | CCND2         | 502.8555           | 0.019167       |
| Hs.502328      | NM_000610     | CD44          | 1.5192             | 0.077196       |
| Hs.461086      | NM_004360     | CDH1          | 0.6278             | 0.439948       |
| Hs.512599      | NM_000077     | CDKN2A        | 15.3837            | 0.009461       |
| Hs.38034       | NM_016952     | CDON          | 0.646              | 0.432212       |
| Hs.440829      | NM_005195     | CEBPD         | 0.3844             | 0.145739       |
| Hs.529862      | NM_001892     | CSNK1A1       | 0.9982             | 0.806901       |
| Hs.631725      | NM_001893     | CSNK2A1       | 0.877              | 0.810796       |
| Hs.646508      | NM_022048     | CTBP1         | 85.6669            | 0.0413035      |
| Hs.591346      | NM_001901     | CTGF          | 4.9531             | 0.076707       |
| Hs.644056      | NM_001895     | CTNNB1        | 1.7279             | 0.368189       |
| Hs.208597      | NM_001328     | CTNNBIP1      | 1.5252             | 0.93029        |
| Hs.166206      | NM_001081     | CUBN          | 0.3535             | 0.1669         |
| Hs.501345      | NM_022802     | CXXC4         | 0.654              | 0.175228       |
| Hs.476018      | NM_001904     | DAAM1         | 0.5628             | 0.196765       |
| Hs.463759      | NM_020248     | DAB2          | 1.9507             | 0.127495       |
| Hs.12248       | NM_025212     | DIXDC1        | 0.9079             | 0.338764       |

**Supplementary Table 2**

|           |           |        |          |          |
|-----------|-----------|--------|----------|----------|
| Hs.654934 | NM_014992 | DKK1   | 0.8801   | 0.433715 |
| Hs.655626 | NM_033425 | DKK3   | 2.1871   | 0.385657 |
| Hs.533717 | NM_003836 | DLK1   | 0.2695   | 0.336468 |
| Hs.591555 | NM_020868 | DPP10  | 3.0018   | 0.241825 |
| Hs.40499  | NM_012242 | DVL1   | 1.5376   | 0.507919 |
| Hs.74375  | NM_004421 | DVL2   | 0.0901   | 0.340893 |
| Hs.144700 | NM_004429 | EFNB1  | 2.0467   | 0.131136 |
| Hs.488293 | NM_005228 | EGFR   | 0.4684   | 0.214059 |
| Hs.326035 | NM_001964 | EGR1   | 0.28     | 0.053672 |
| Hs.118640 | NM_004422 | EP300  | 1.7992   | 0.294279 |
| Hs.644231 | NM_005239 | ETS2   | 0.2771   | 0.014438 |
| Hs.517517 | NM_001429 | FBXW11 | 1.8096   | 0.345229 |
| Hs.484138 | NM_012300 | FBXW4  | 2.3359   | 0.360514 |
| Hs.199905 | NM_019851 | FGF20  | 0.0591   | 0.19561  |
| Hs.1755   | NM_002007 | FGF4   | 0.0632   | 0.334883 |
| Hs.567268 | NM_002009 | FGF7   | 7.501    | 0.058556 |
| Hs.111    | NM_002010 | FGF9   | 4.847    | 0.305139 |
| Hs.203717 | NM_002026 | FN1    | 0.2621   | 0.014635 |
| Hs.283565 | NM_005438 | FOSL1  | 1.6828   | 0.289687 |
| Hs.500822 | NM_022039 | FOSL1  | 0.4939   | 0.980325 |
| Hs.1755   | NM_002007 | FOXP1  | 0.2592   | 0.207298 |
| Hs.283565 | NM_005438 | FRAT1  | 0.8164   | 0.580084 |
| Hs.663679 | NM_003593 | FRZB   | 1.8264   | 0.23172  |
| Hs.9914   | NM_006350 | FST    | 0.0637   | 0.014093 |
| Hs.126057 | NM_005479 | FZD1   | 3.6402   | 0.043581 |
| Hs.128453 | NM_001463 | FZD2   | 2.7715   | 0.287782 |
| Hs.36975  | NM_000510 | FZD3   | 356.807  | 0.190159 |
| Hs.94234  | NM_003505 | FZD4   | 3.5488   | 0.521644 |
| Hs.142912 | NM_001466 | FZD5   | 2.4777   | 0.127096 |
| Hs.40735  | NM_017412 | FZD6   | 1.2737   | 0.47334  |
| Hs.19545  | NM_012193 | FZD7   | 195.4515 | 0.200307 |
| Hs.17631  | NM_003468 | FZD8   | 19.3689  | 0.327136 |
| Hs.591863 | NM_003506 | FZD9   | 1.4346   | 0.693301 |
| Hs.1573   | NM_000557 | GDF5   | 35.5575  | 0.304173 |

**Supplementary Table 2**

|           |              |         |          |          |
|-----------|--------------|---------|----------|----------|
| Hs.248114 | NM_000514    | GDNF    | 0.3456   | 0.711121 |
| Hs.74471  | NM_000165    | GJA1    | 1.3123   | 0.057613 |
| Hs.173859 | NM_003507    | GSK3A   | 3.7642   | 0.352465 |
| Hs.302634 | NM_031866    | GSK3B   | 0.9597   | 0.67877  |
| Hs.180919 | NM_002166    | ID2     | 0.1909   | 0.021169 |
| Hs.160562 | NM_000618    | IGF1    | 0.0914   | 0.008854 |
| Hs.523414 | NM_000612    | IGF2    | 0.1459   | 0.090791 |
| Hs.654458 | NM_000600    | IL6     | 3.1131   | 0.963903 |
| Hs.471508 | NM_005544    | IRS1    | 0.4656   | 0.144492 |
| Hs.728907 | NM_000214    | JAG1    | 3.7278   | 0.027988 |
| Hs.466828 | NM_019884    | JUN     | 0.9731   | 0.594883 |
| Hs.508234 | NM_001730    | KLF5    | 5.3967   | 0.06284  |
| Hs.445733 | NM_002093    | KREMEN1 | 154.2365 | 0.226321 |
| Hs.714791 | NM_002228    | LEF1    | 308.1168 | 0.02936  |
| Hs.162757 | NM_002332    | LRP1    | 0.2105   | 0.034102 |
| Hs.229335 | NM_001039570 | LRP5    | 0.6166   | 0.183252 |
| Hs.555947 | NM_016269    | LRP6    | 0.555    | 0.155665 |
| Hs.6347   | NM_002335    | MAPK8   | 6.1575   | 0.75276  |
| Hs.132966 | NM_000245    | MET     | 0.2846   | 0.7004   |
| Hs.513617 | NM_004530    | MMP2    | 3.6133   | 0.018036 |
| Hs.584775 | NM_002336    | MMP7    | 3.1836   | 0.095811 |
| Hs.297413 | NM_004994    | MMP9    | 2.271    | 0.185335 |
| Hs.202453 | NM_002467    | MYC     | 0.9281   | 0.568259 |
| Hs.661360 | NM_024865    | NANOG   | 1.5285   | 0.428904 |
| Hs.592059 | NM_033119    | NFATC1  | 1.1599   | 0.860189 |
| Hs.208759 | NM_016231    | NKD1    | 1.2374   | 0.283018 |
| Hs.643588 | NM_000325    | NLK     | 1.2475   | 0.449693 |
| Hs.21422  | NM_005010    | NRCAM   | 1.7331   | 0.606889 |
| Hs.131704 | NM_003873    | NRP1    | 0.5898   | 0.185177 |
| Hs.494312 | NM_006180    | NTRK2   | 5.6162   | 0.2609   |
| Hs.74615  | NM_006206    | PDGFRA  | 1.1961   | 0.349943 |
| Hs.386453 | NM_022825    | PITX2   | 496.5058 | 0.103628 |
| Hs.466871 | NM_002659    | PLAUR   | 3.6543   | 0.003192 |
| Hs.483408 | NM_002715    | PORCN   | 3.8477   | 0.0382   |

**Supplementary Table 2**

|           |           |          |          |           |
|-----------|-----------|----------|----------|-----------|
| Hs.249184 | NM_002701 | POU5F1   | 0.9376   | 0.346766  |
| Hs.405156 | NM_003713 | PPAP2B   | 0.2326   | 0.016883  |
| Hs.467192 | NM_014225 | PPARD    | 3.1145   | 0.34066   |
| Hs.256587 | NM_015617 | PRICKLE1 | 0.5318   | 0.383244  |
| Hs.494538 | NM_000264 | PTCH1    | 1.4016   | 0.296225  |
| Hs.196384 | NM_000963 | PTGS2    | 2.2828   | 0.202303  |
| Hs.647774 | NM_021205 | PYGO1    | 446.9594 | 0.053844  |
| Hs.401388 | NM_021627 | RHOA     | 0.631    | 0.381721  |
| Hs.713546 | NM_003012 | RHOA     | 0.8145   | 0.449993  |
| Hs.535845 | NM_004348 | RUNX2    | 3.4963   | 0.434054  |
| Hs.658169 | NM_003014 | RUVBL1   | 1.2078   | 0.451543  |
| Hs.728760 | NM_004252 | SFRP1    | 0.6585   | 0.555706  |
| Hs.481022 | NM_003013 | SFRP2    | 3.2991   | 0.923724  |
| Hs.98367  | NM_022454 | SFRP4    | 2.9363   | 0.243111  |
| Hs.716658 | NM_005982 | SIX1     | 2.6751   | 0.174451  |
| Hs.437846 | NM_005631 | SMO      | 0.269    | 0.090111  |
| Hs.389457 | NM_003181 | SOX17    | 0.7652   | 0.653382  |
| Hs.518438 | NM_003106 | SOX2     | 0.1027   | 0.334281  |
| Hs.647409 | NM_000346 | SOX9     | 3.5329   | 0.064583  |
| Hs.389457 | NM_003181 | T        | 4.7431   | 0.334218  |
| Hs.644653 | NM_003199 | TCF4     | 0.7236   | 0.856727  |
| Hs.573153 | NM_003202 | TCF7     | 2.0098   | 0.087617  |
| Hs.516297 | NM_031283 | TCF7L1   | 1.1492   | 0.821264  |
| Hs.593995 | NM_030756 | TCF7L2   | 0.7081   | 0.973228  |
| Hs.592317 | NM_003239 | TGFB3    | 0.7306   | 0.432056  |
| Hs.197320 | NM_005077 | TLE1     | 1.5404   | 0.337627  |
| Hs.66744  | NM_000474 | TWIST1   | 12.5715  | 0.088269  |
| Hs.332173 | NM_003260 | VANGL2   | 5.6009   | 0.040011  |
| Hs.73793  | NM_003376 | VEGFA    | 0.8421   | 0.886806  |
| Hs.284122 | NM_007191 | WIF1     | 1.8455   | 0.453453  |
| Hs.492974 | NM_003882 | WISP1    | 1.0322   | 0.373973  |
| Hs.592145 | NM_003881 | WISP2    | 0.7531   | 0.334322  |
| Hs.248164 | NM_005430 | WNT1     | 0.4804   | 0.321898  |
| Hs.121540 | NM_025216 | WNT10A   | 5.8051   | 0.0186653 |

**Supplementary Table 2**

|           |           |       |        |           |
|-----------|-----------|-------|--------|-----------|
| Hs.108219 | NM_004626 | WNT11 | 0.0949 | 0.048227  |
| Hs.272375 | NM_057168 | WNT16 | 1.2518 | 0.691911  |
| Hs.567356 | NM_003391 | WNT2  | 0.7298 | 0.684009  |
| Hs.258575 | NM_004185 | WNT2B | 0.8831 | 0.739681  |
| Hs.445884 | NM_030753 | WNT3  | 0.4187 | 0.266615  |
| Hs.336930 | NM_033131 | WNT3A | 6.707  | 0.341422  |
| Hs.336930 | NM_033131 | WNT3A | 0.9491 | 0.399296  |
| Hs.25766  | NM_030761 | WNT4  | 1.458  | 0.65577   |
| Hs.696364 | NM_003392 | WNT5A | 2.3933 | 0.368331  |
| Hs.306051 | NM_032642 | WNT5B | 0.0137 | 0.214647  |
| Hs.29764  | NM_006522 | WNT6  | 0.4673 | 0.184066  |
| Hs.72290  | NM_004625 | WNT7A | 0.0878 | 0.154468  |
| Hs.512714 | NM_058238 | WNT7B | 7.147  | 0.0269222 |
| Hs.591274 | NM_058244 | WNT8A | 0.1333 | 0.079418  |
| Hs.149504 | NM_003395 | WNT9A | 6.6223 | 0.139943  |

**Supplementary Table 3**

| Unigene   | Refseq       | Symbol   | Week 26 TAA vs Week 26 Vehicle |          | Vehicle vs Liposomal Clodronate |          |
|-----------|--------------|----------|--------------------------------|----------|---------------------------------|----------|
|           |              |          | Fold change                    | P value  | Fold Change                     | P value  |
| Rn.154810 | NM_133401    | Abcb1a   | 0.3124                         | 0.537638 | -2.8823                         | 0.000946 |
| Rn.91370  | NM_013149    | Ahr      | 0.7719                         | 0.876842 | -3.5732                         | 0.000391 |
| Rn.119611 | NM_199115    | Angptl4  | 0.4715                         | 0.087664 | -2.6492                         | 0.03445  |
| Rn.41192  | NM_001044249 | Antxr1   | 4.4467                         | 0.026362 | -5.6656                         | 0.000418 |
| Rn.162212 | NM_024355    | Axin2    | 1.7309                         | 0.321267 | -2.2123                         | 0.000242 |
| Rn.9722   | NM_013414    | Bglap    | 1.071                          | 0.472776 | 1.1998                          | 0.429668 |
| Rn.54471  | NM_022274    | Birc5    | 1.3463                         | 0.40443  | -2.5092                         | 0.103523 |
| Rn.10318  | NM_012827    | Bmp4     | 2.172                          | 0.155737 | -5.2014                         | 0.0171   |
| Rn.21800  | NM_001007148 | Btrc     | 0.6743                         | 0.422701 | -4.1379                         | 0.000006 |
| Rn.206369 | NM_175595    | Cacna2d3 | 1.3986                         | 0.407183 | -3.4197                         | 0.181397 |
| Rn.22279  | NM_171992    | Ccnd1    | 1.0028                         | 0.999982 | -2.0546                         | 0.004269 |
| Rn.96083  | NM_022267    | Ccnd2    | 4.9126                         | 0.047605 | -2.0689                         | 0.018486 |
| Rn.1120   | NM_012924    | Cd44     | 2.716                          | 0.025351 | -2.3656                         | 0.025613 |
| Rn.1303   | NM_031334    | Cdh1     | 0.7593                         | 0.352033 | -4.0715                         | 0.000022 |
| Rn.48717  | NM_031550    | Cdkn2a   | 6.6013                         | 0.053022 | -2.4519                         | 0.340502 |
| Rn.10818  | NM_017358    | Cdon     | 1.0973                         | 0.486838 | -2.0978                         | 0.000627 |
| Rn.202620 | NM_013154    | Cebpd    | 0.4953                         | 0.212764 | -2.0809                         | 0.101454 |
| Rn.17145  | NM_022266    | Ctgf     | 5.996                          | 0.0666   | -4.6392                         | 0.003486 |
| Rn.3236   | NM_053332    | Cubn     | 0.4711                         | 0.200303 | -2.2588                         | 0.282764 |
| Rn.161784 | NM_024159    | Dab2     | 1.2848                         | 0.745853 | -3.6525                         | 0.000044 |
| Rn.214343 | NM_001106350 | Dkk1     | 2.2176                         | 0.187561 | -2.7111                         | 0.344153 |
| Rn.14547  | NM_053744    | Dlk1     | 0.3383                         | 0.345789 | -3.7035                         | 0.1882   |
| Rn.217077 | NM_001012205 | Dpp10    | 1.6503                         | 0.31494  | -4.5385                         | 0.327301 |
| Rn.44398  | NM_017089    | Efnb1    | 1.8519                         | 0.170823 | -1.7458                         | 0.045454 |
| Rn.37227  | NM_031507    | Egfr     | 0.543                          | 0.324731 | -2.9805                         | 0.027033 |
| Rn.9096   | NM_012551    | Egr1     | 0.6673                         | 0.436509 | -5.0475                         | 0.187816 |
| Rn.20403  | NM_057104    | Enpp2    | 0.3212                         | 0.027582 | -1.0062                         | 0.993231 |
| Rn.164554 | NM_001107107 | Ets2     | 0.0849                         | 0.270618 | -2.7049                         | 0.000283 |
| Rn.64492  | NM_023961    | Fgf20    | 0.1444                         | 0.335377 | -11.867                         | 0.125809 |
| Rn.81223  | NM_053809    | Fgf4     | 5.6383                         | 0.071856 | -13.9664                        | 0.173042 |
| Rn.98842  | NM_022182    | Fgf7     | 1.1998                         | 0.396421 | -3.4997                         | 0.014612 |

**Supplementary Table 3**

|           |              |        |         |          |          |          |
|-----------|--------------|--------|---------|----------|----------|----------|
| Rn.25174  | NM_012952    | Fgf9   | 0.3039  | 0.015442 | -5.594   | 0.002631 |
| Rn.1604   | NM_019143    | Fn1    | 2.0248  | 0.112669 | -1.9193  | 0.002031 |
| Rn.11306  | NM_012953    | Fosl1  | 0.1297  | 0.018339 | -4.8812  | 0.126972 |
| Rn.162557 | NM_012561    | Fst    | 5.5318  | 0.02354  | -1.6459  | 0.179177 |
| Rn.127822 | XM_001066344 | Gdf5   | 12.775  | 0.306167 | -13.6632 | 0.238315 |
| Rn.53970  | NM_019139    | Gdnf   | 0.446   | 0.753026 | -1.577   | 0.170702 |
| Rn.10346  | NM_012567    | Gja1   | 2.5188  | 0.009723 | -1.1177  | 0.966704 |
| Rn.3272   | NM_013060    | Id2    | 0.2213  | 0.032189 | -4.8812  | 0.000026 |
| Rn.6282   | NM_178866    | Igf1   | 0.1157  | 0.019487 | -1.9687  | 0.008581 |
| Rn.118681 | NM_031511    | Igf2   | 0.2477  | 0.484296 | -3.9237  | 0.08781  |
| Rn.9873   | NM_012589    | Il6    | 1.225   | 0.717016 | -8.3816  | 0.01944  |
| Rn.10476  | NM_012969    | Irs1   | 0.4789  | 0.863025 | -2.3277  | 0.000941 |
| Rn.88804  | NM_019147    | Jag1   | 4.3214  | 0.020525 | -4.2151  | 0.003374 |
| Rn.8954   | NM_053394    | Klf5   | 3.4798  | 0.056881 | -4.034   | 0.01764  |
| Rn.21926  | NM_130429    | Lef1   | 11.5835 | 0.001844 | -5.8383  | 0.126943 |
| Rn.22436  | XM_243524    | Lrp1   | 0.2441  | 0.057217 | -3.6315  | 0.000052 |
| Rn.10617  | NM_031517    | Met    | 0.5088  | 0.96456  | -2.1124  | 0.00209  |
| Rn.6422   | NM_031054    | Mmp2   | 5.3157  | 0.005038 | -2.093   | 0.027351 |
| Rn.10282  | NM_012864    | Mmp7   | 4.1996  | 0.105957 | -3.9647  | 0.107073 |
| Rn.10209  | NM_031055    | Mmp9   | 2.0691  | 0.196252 | -4.6877  | 0.002253 |
| Rn.12072  | NM_012603    | Myc    | 0.5168  | 0.158704 | -7.0237  | 0.000014 |
| Rn.124668 | NM_001100781 | Nanog  | 1.0775  | 0.350126 | -15.8223 | 0.339064 |
| Rn.10691  | NM_013150    | Nrcam  | 1.2092  | 0.901405 | -1.5789  | 0.082794 |
| Rn.10815  | NM_145098    | Nrp1   | 0.7146  | 0.313081 | -2.0357  | 0.019068 |
| Rn.11246  | NM_012731    | Ntrk2  | 3.9525  | 0.23202  | -14.1124 | 0.216782 |
| Rn.55127  | NM_012802    | Pdgfra | 1.4593  | 0.215249 | -2.5237  | 0.001757 |
| Rn.17591  | NM_019334    | Pitx2  | 1.1987  | 0.388749 | -4.3436  | 0.395355 |
| Rn.82711  | NM_017350    | Plaur  | 4.2361  | 0.00443  | -4.9665  | 0.000015 |
| Rn.161748 | NM_001009178 | Pou5f1 | 1.0869  | 0.850147 | -5.2923  | 0.069973 |
| Rn.12038  | NM_138905    | Ppap2b | 0.3081  | 0.026834 | 2.4387   | 0.534456 |
| Rn.96181  | NM_013141    | Ppard  | 1.944   | 0.096595 | -10.4751 | 0.000009 |
| Rn.105585 | NM_053566    | Ptch1  | 0.7639  | 0.432117 | -2.5121  | 0.002561 |
| Rn.44369  | NM_017232    | Ptgs2  | 2.4885  | 0.196045 | -2.6707  | 0.043315 |
| Rn.214214 | NM_053470    | Runx2  | 2.4863  | 0.253135 | -3.3727  | 0.006011 |



**Supplementary Table 3**

|           |              |        |        |          |          |          |
|-----------|--------------|--------|--------|----------|----------|----------|
| Rn.102416 | NM_001100700 | Sfrp2  | 1.5292 | 0.725607 | -4.7094  | 0.243448 |
| Rn.23396  | NM_053759    | Six1   | 1.4342 | 0.398641 | -5.1179  | 0.498894 |
| Rn.44429  | NM_012807    | Smo    | 0.5554 | 0.348958 | -3.4876  | 0.184429 |
| Rn.219221 | NM_001109181 | Sox2   | 0.1466 | 0.334293 | -5.3538  | 0.358484 |
| Rn.95086  | XM_001081628 | Sox9   | 4.9942 | 0.017468 | -4.3637  | 0.000304 |
| Rn.218650 | NM_001106209 | T      | 2.0817 | 0.332785 | -3.4119  | 0.391776 |
| Rn.33103  | NM_001107865 | Tcf3   | 1.1331 | 0.893845 | -4.2199  | 0.000012 |
| Rn.23354  | NM_053369    | Tcf4   | 1.6777 | 0.174341 | -3.5898  | 0.000316 |
| Rn.106335 | XM_343891    | Tcf7   | 1.1479 | 0.659143 | -2.5034  | 0.144293 |
| Rn.105849 | XM_001054844 | Tcf7l2 | 0.9495 | 0.801479 | -4.1715  | 0.00063  |
| Rn.7018   | NM_013174    | Tgfb3  | 1.0554 | 0.920513 | -4.6232  | 0.00021  |
| Rn.6875   | XM_342851    | Tle1   | 1.8154 | 0.335994 | -1.4082  | 0.193397 |
| Rn.161904 | NM_053530    | Twist1 | 2.7043 | 0.314015 | -11.4232 | 0.014558 |
| Rn.1923   | NM_031836    | Vegfa  | 0.9762 | 0.912517 | -5.3786  | 0.000157 |
| Rn.63486  | NM_031716    | Wisp1  | 1.4656 | 0.341059 | -2.4832  | 0.53539  |
| Rn.53991  | NM_031590    | Wisp2  | 0.4279 | 0.334337 | -5.8451  | 0.011305 |
| Rn.218621 | NM_001107005 | Wnt3a  | 0.6519 | 0.437359 | -2.5296  | 0.279573 |
| Rn.48749  | NM_022631    | Wnt5a  | 0.9787 | 0.368322 | 1.197    | 0.341606 |
| Rn.40411  | NM_001105783 | Wnt9a  | 2.4777 | 0.363072 | -1.3937  | 0.2824   |

Supplementary Table 4

| Unigene   | Refseq       | Symbol   | ICG-001 treated cells |        |        |          |         | C-59 treated cells |          |        |        |         |
|-----------|--------------|----------|-----------------------|--------|--------|----------|---------|--------------------|----------|--------|--------|---------|
|           |              |          | 1079                  | LP     | WITT   | SW1      | 1196    | 1079               | LP       | WITT   | SW1    | 1196    |
| Hs.737655 | NM_000927    | ABCB1    | UD                    | 0.0655 | UD     | 0.1496   | UD      | 0.3439             | 0.6543   | UD     | 0.6373 | 0.9879  |
| Hs.431048 | NM_005157    | ABL1     | 0.8444                | 0.6173 | 1.6888 | 0.483    | 1.3379  | 0.9879             | 1.0122   | 0.8293 | 1.9053 | 0.3686  |
| Hs.171189 | NM_001621    | AHR      | UD                    | UD     | UD     | UD       | 0.0333  | 0.6974             | 0.006    | 0.364  | 3.8816 | 1.0497  |
| Hs.533262 | NM_013366    | ANAPC2   | 0.9767                | UD     | UD     | 0.1183   | UD      | UD                 | UD       | UD     | UD     | UD      |
| Hs.9613   | NM_001039667 | ANGPTL4  | 2.8                   | UD     | UD     | 0.578    | 3.6535  | 0.05               | 0.1165   | 2.2069 | 0.3157 | 12.7286 |
| Hs.165859 | NM_018153    | ANTXR1   | 0.7049                | 4.5765 | 1.7141 | 0.0184   | UD      | 0.0913             | 0.2908   | UD     | 0.7354 | UD      |
| Hs.367437 | NM_000051    | ATM      | 1.1696                | 0.0341 | UD     | 0.0689   | UD      | 0.5874             | 0.6678   | 0.4033 | 1.181  | UD      |
| Hs.271791 | NM_001184    | ATR      | 1.1065                | 0.1576 | 1.1376 | 1.8025   | 0.8586  | 1.4666             | 0.6725   | 0.8123 | 1.6472 | 0.5114  |
| Hs.250822 | NM_003600    | AURKA    | 0.527                 | UD     | 0.4952 | 0.1183   | 0.2535  | 0.3718             | 0.0574   | 0.6285 | 0.0508 | 0.0148  |
| Hs.442658 | NM_004217    | AURKB    | 0.1204                | 1.1204 | 0.1633 | 0.0352   | 0.1989  | 0.2487             | 0.0646   | 0.1672 | 0.0508 | 0.0098  |
| Hs.156527 | NM_004655    | AXIN2    | UD                    | UD     | UD     | UD       | 0.0172  | 0.1001             | 2.4589   | 0.7911 | 1.8877 | 2.9794  |
| Hs.715543 | NM_016567    | BCCIP    | 1.4006                | UD     | 0.8213 | 0.0866   | 0.4569  | 0.4154             | 0.5026   | 0.2146 | 0.933  | 1.1749  |
| Hs.150749 | NM_000633    | BCL2     | 0.0696                | 0.0868 | 0.3501 | 0.0165   | 0.3392  | 3.2773             | 0.9122   | 3.1383 | 0.5625 | 0.0165  |
| Hs.654541 | NM_199173    | BGLAP    | 0.8738                | 0.9102 | 1.2205 | 1.0134   | 1.0135  | 0.1469             | 0.0272   | 0.723  | 0.5212 | 1.6818  |
| Hs.744872 | NM_001168    | BIRC5    | 0.0421                | 0.0483 | 0.1601 | 0.0495   | UD      | UD                 | 0.1414   | UD     | 0.3463 | 0.068   |
| Hs.68879  | NM_130851    | BMP4     | 0.2407                | 0.0029 | 0.2988 | 0.1045   | 0.0323  | 0.2432             | 0.066    | UD     | 0.0713 | 2.5937  |
| Hs.194143 | NM_007294    | BRCA1    | 0.7824                | 1.0747 | 1.0182 | 0.5322   | 0.6156  | 0.2978             | 0.869    | 0.1487 | 1.3947 | 0.9091  |
| Hs.34012  | NM_000059    | BRCA2    | 0.9767                | 0.0265 | UD     | 0.0713   | UD      | UD                 | UD       | UD     | UD     | 0.068   |
| Hs.643802 | NM_033637    | BTRC     | 1.0984                | 1.024  | 1.8372 | 0.7841   | 0.6874  | 0.168              | UD       | 0.1871 | 0.0619 | 0.7448  |
| Hs.656687 | NM_018398    | CACNA2D3 | 0.8799                | 1.8846 | 1.229  | 1.0347   | UD      | 0.9352             | 0.0023   | UD     | 0.2594 | 0.1203  |
| Hs.141125 | NM_004346    | CASP3    | 1.0762                | UD     | 0.7933 | 0.1183   | 0.4698  | UD                 | 0.9314   | 0.6373 | UD     | UD      |
| Hs.58974  | NM_001237    | CCNA2    | 0.1422                | UD     | 0.0543 | 0.1134   | 0.115   | 0.5635             | 0.5061   | 0.1934 | 0.5212 | 0.7592  |
| Hs.23960  | NM_031966    | CCNB1    | 0.1589                | UD     | 0.0636 | UD       | 0.2059  | 0.6655             | 0.6231   | 0.1817 | 0.9526 | 0.5874  |
| Hs.194698 | NM_004701    | CCNB2    | 0.1567                | UD     | 0.0701 | UD       | 0.2117  | 0.9948             | 0.7942   | 0.4175 | 0.4965 | 0.0223  |
| Hs.633351 | NM_005190    | CCNC     | 1.46                  | UD     | 0.8621 | 0.4698   | 0.5824  | 0.4212             | 0.6103   | 0.483  | 0.9727 | 1.2248  |
| Hs.523852 | NM_053056    | CCND1    | 0.0863                | 0.0129 | 0.3178 | 0.0326   | 0.0656  | 0.2257             | 0.051    | 0.6746 | 0.3231 | 0.0017  |
| Hs.376071 | NM_001759    | CCND2    | UD                    | 0.4159 | 0.5571 | 0.5622   | 27.0958 | 0.0101             | 0.0034   | 8.1117 | 0.2449 | 0.0014  |
| Hs.534307 | NM_001760    | CCND3    | 0.715                 | UD     | 1.3717 | 0.2466   | 0.0563  | 0.0771             | 1.1708   | 1.8532 | 2.0705 | 1.1038  |
| Hs.244723 | NM_001238    | CCNE1    | 0.2805                | 0.1262 | 0.7933 | 0.0075   | 0.5664  | 0.866              | 0.1049   | 0.3057 | 0.0684 | 0.0131  |
| Hs.1973   | NM_001761    | CCNF     | 0.6718                | UD     | 0.6096 | 0.5743   | 0.1073  | 0.3957             | 0.7887   | 0.3463 | 2.3295 | 1.127   |
| Hs.79101  | NM_004060    | CCNG1    | 0.2359                | 1.5199 | 1.7975 | 0.0374   | 0.4118  | 2.0885             | 0.9379   | 1.434  | 0.9013 | 4.3545  |
| Hs.740456 | NM_004354    | CCNG2    | 0.9767                | UD     | UD     | 0.25     | UD      | UD                 | 153.0119 | UD     | UD     | UD      |
| Hs.292524 | NM_001239    | CCNH     | 0.8444                | 0.0799 | 0.8988 | 0.2253   | 0.7792  | 1.3402             | 0.6678   | 0.6783 | 1.057  | 0.7969  |
| Hs.92308  | NM_001240    | CCNT1    | 0.9767                | UD     | UD     | UD       | 2.7132  | UD                 | UD       | UD     | 1.8277 | UD      |
| Hs.502328 | NM_000610    | CD44     | 0.1041                | 0.0993 | 0.0852 | 0.0796   | 0.0451  | 1.0257             | 0.0285   | 0.6653 | 3.3558 | 1.4641  |
| Hs.374127 | NM_003903    | CDC16    | 0.9903                | 0.5487 | 1.3068 | 0.473    | 1.3013  | 0.6655             | 0.7997   | 0.3209 | 1.5476 | 1.331   |
| Hs.524947 | NM_001255    | CDC20    | 0.1309                | UD     | 0.3027 | UD       | 0.507   | 0.1911             | 0.6586   | 0.1593 | 0.8351 | 1.0886  |
| Hs.437705 | NM_001789    | CDC25A   | 0.3912                | UD     | 0.7351 | UD       | 0.1103  | 0.3236             | 0.6866   | 0.1869 | 1.4142 | 0.825   |
| Hs.656    | NM_001790    | CDC25C   | 0.9903                | UD     | 0.4783 | UD       | 0.2483  | 0.9028             | 0.6188   | 0.2333 | 0.4897 | 0.9154  |
| Hs.514997 | NM_004359    | CDC34    | 0.9767                | 0.0549 | UD     | 0.1111   | UD      | UD                 | 1.8119   | 0.6462 | UD     | UD      |
| Hs.405958 | NM_001254    | CDC6     | 1.0324                | UD     | 1.1376 | UD       | 0.2832  | 0.4514             | 0.5895   | 0.1638 | 0.6552 | 1.0371  |
| Hs.461086 | NM_004360    | CDH1     | UD                    | UD     | UD     | UD       | 0.8405  | 0.0787             | UD       | 0.4836 | 0.6537 | 1.1688  |
| Hs.732435 | NM_001786    | CDK1     | 0.1402                | UD     | 0.0097 | UD       | 0.183   | 0.7133             | 0.453    | 0.0621 | 0.7846 | 1.0811  |
| Hs.689624 | NM_001798    | CDK2     | 0.0721                | UD     | 0.1838 | 0.0243   | 0.2207  | 0.6166             | 0.8873   | 0.4263 | 1.3379 | 0.6795  |
| Hs.95577  | NM_000075    | CDK4     | 0.7663                | UD     | 1.2025 | UD       | 0.1507  | 0.7645             | 0.7778   | 0.6643 | 1.3851 | 1.1587  |
| Hs.500015 | NM_003885    | CDK5R1   | 0.9176                | UD     | 2.3883 | 0.3978   | 0.2349  | 0.2337             | 1.2636   | 0.6926 | UD     | 0.8842  |
| Hs.435952 | NM_016408    | CDK5RAP1 | 1.271                 | 0.0197 | 0.4918 | 0.1426   | 0.2466  | 0.5753             | 1.7994   | 0.2912 | 0.6113 | 1.0299  |
| Hs.119882 | NM_001259    | CDK6     | 0.0965                | 0.2198 | 0.1442 | 0.0175   | 0.1604  | 2.1177             | 1.482    | 5.8563 | 1.2142 | 0.5793  |
| Hs.184298 | NM_001799    | CDK7     | 0.1503                | UD     | 0.1452 | 4.06E+09 | 0.895   | 1.0811             | 0.6818   | 0.8123 | 1.181  | 1.0736  |
| Hs.695166 | NM_001260    | CDK8     | 0.8213                | 0.036  | 0.8621 | 0.0374   | 1.181   | UD                 | 0.8873   | 0.6071 | UD     | UD      |
| Hs.732576 | NM_000389    | CDKN1A   | 1.2977                | UD     | 0.7933 | 0.507    | 2.5315  | 3.2098             | 0.4082   | 9.5137 | 1.8921 | 2.0035  |
| Hs.238990 | NM_004064    | CDKN1B   | 0.5571                | UD     | 1.3068 | UD       | 1.5476  | UD                 | UD       | UD     | UD     | UD      |
| Hs.512599 | NM_000077    | CDKN2A   | UD                    | 0.1343 | UD     | UD       | 9.249   | UD                 | 0.0381   | 0.1044 | 0.1989 | 0.0557  |
| Hs.72901  | NM_004936    | CDKN2B   | 4.6784                | UD     | 1.7363 | 0.5743   | 5.9794  | 0.0719             | 0.9314   | 0.2483 | UD     | 1.5183  |
| Hs.84113  | NM_005192    | CDKN3    | 1.1297                | 0.0449 | 0.5494 | 0.0387   | 0.5783  | 0.3517             | 0.9643   | 0.1349 | 0.5    | 0.634   |
| Hs.38034  | NM_016952    | CDON     | 0.8799                | 0.007  | 0.4689 | 212.186  | UD      | 0.2643             | 0.0147   | UD     | 1.1647 | 0.3978  |
| Hs.440829 | NM_005195    | CEBPD    | 1.1451                | 2.8763 | 0.5462 | 0.3684   | 0.6827  | 0.2122             | 0.0149   | 0.2574 | 0.2558 | 0.2813  |
| Hs.595920 | NM_001274    | CHEK1    | 0.1336                | UD     | 0.1123 | UD       | 0.3415  | 1.2163             | 0.9643   | 0.8123 | 1.1567 | 0.9091  |
| Hs.505297 | NM_007194    | CHEK2    | 1.1535                | 0.5799 | 0.8503 | 0.5      | 0.6926  | UD                 | 0.7059   | 0.1731 | UD     | UD      |
| Hs.374378 | NM_001826    | CKS1B    | 0.6764                | 0.1677 | 1.0541 | 2.514    | 0.3099  | 0.5258             | 0.863    | 0.4263 | 1.0425 | 1.2768  |
| Hs.83758  | NM_001827    | CKS2     | 1.5115                | 0.4582 | 0.73   | 0.2398   | 0.3276  | 0.6473             | 0.7359   | 0.3057 | 0.8706 | 1.331   |
| Hs.410037 | NM_001901    | CTGF     | 0.4492                | 11.666 | 0.2548 | 0.0674   | 1.8268  | 0.2477             | 0.7464   | 0.3396 | 0.0909 | 0.2983  |
| Hs.166206 | NM_001081    | CUBN     | UD                    | 0.0937 | UD     | 5.6146   | UD      | UD                 | UD       | UD     | 1.1647 | UD      |

**Supplementary Table 4**

|           |           |         |        |        |          |          |         |        |         |        |          |        |
|-----------|-----------|---------|--------|--------|----------|----------|---------|--------|---------|--------|----------|--------|
| Hs.146806 | NM_003592 | CUL1    | 0.1402 | 2.8167 | 0.1063   | 0.089    | 0.5946  | 0.7384 | 0.863   | 0.4965 | 1.1096   | 1.0515 |
| Hs.82919  | NM_003591 | CUL2    | 0.1221 | 0.3989 | 0.0741   | 0.0451   | 0.6507  | 0.8904 | 0.5773  | 0.3276 | 0.9727   | 1.359  |
| Hs.372286 | NM_003590 | CUL3    | 1.5977 | 0.3354 | 0.4135   | 0.2269   | 0.6643  | 0.5149 | 0.4593  | 0.6373 | 1.1647   | 1.0371 |
| Hs.696631 | NM_001343 | DAB2    | 0.2391 | 0.9823 | 0.3472   | 0.7522   | 0.3948  | 0.5757 | 0.0009  | 0.713  | 4.6268   | 0.23   |
| Hs.40499  | NM_012242 | DKK1    | 0.1523 | 0.0435 | UD       | 0.3163   | 0.0144  | 0.5837 | 1.7029  | 1.4866 | 5.6569   | 0.4019 |
| Hs.533717 | NM_003836 | DLK1    | 0.1062 | 0.0858 | 0.1365   | 0.0321   | UD      | 0.0584 | 0.0131  | UD     | 0.3368   | UD     |
| Hs.580539 | NM_020868 | DPP10   | UD     | 0.5192 | UD       | 2.988    | UD      | 0.6256 | 0.0042  | UD     | 1.007    | 0.2308 |
| Hs.654393 | NM_005225 | E2F1    | 0.0411 | UD     | 0.2824   | UD       | 15.7797 | 0.1479 | 1.3264  | 0.4475 | 2.2191   | 1.3402 |
| Hs.108371 | NM_001950 | E2F4    | 0.5021 | UD     | 1.9399   | 0.0379   | 0.2059  | 0.3374 | 0.2188  | 0.8827 | 0.083    | 1.0371 |
| Hs.144700 | NM_004429 | EFNB1   | 1.1855 | 0.226  | 1.4117   | 1.5149   | UD      | UD     | UD      | UD     | 0.1426   | UD     |
| Hs.605083 | NM_005228 | EGFR    | 3.0072 | UD     | UD       | 1.3279   | 0.0662  | 0.8448 | 0.1385  | 0.3665 | 6.1475   | 0.7819 |
| Hs.708393 | NM_001964 | EGR1    | 1.2444 | 1.833  | 5.608    | 0.611    | 2.0129  | UD     | UD      | UD     | 0.1493   | UD     |
| Hs.644231 | NM_005239 | ETS2    | UD     | 4.1821 | UD       | UD       | 1.0205  | 0.2443 | 0.0036  | 0.3516 | 0.9794   | 3.5064 |
| Hs.199905 | NM_019851 | FGF20   | UD     | 0.1823 | UD       | UD       | 0.0156  | 0.0676 | 0.2694  | UD     | 1.1647   | UD     |
| Hs.1755   | NM_002007 | FGF4    | UD     | UD     | UD       | UD       | 0.003   | UD     | UD      | 0.082  | 1.1647   | UD     |
| Hs.567268 | NM_002009 | FGF7    | 1.6534 | UD     | 3.3577   | 1.1885   | UD      | 0.1256 | 0.0135  | UD     | 0.5212   | UD     |
| Hs.111    | NM_002010 | FGF9    | UD     | UD     | UD       | UD       | 1.042   | 0.0952 | 0.0059  | UD     | 1.0116   | 1.5316 |
| Hs.203717 | NM_002026 | FN1     | UD     | UD     | UD       | UD       | UD      | 0.9704 | 0.2585  | UD     | 165.4212 | 0.1358 |
| Hs.283565 | NM_005438 | FOSL1   | 1.1937 | 0.1004 | 1.5342   | 14.5121  | 0.6195  | 1.7092 | 0.277   | 0.1722 | 3.1023   | 4.6268 |
| Hs.9914   | NM_006350 | FST     | UD     | UD     | UD       | 1.865    | UD      | 0.189  | 0.0038  | 0.0537 | 30.1343  | 0.4948 |
| Hs.173859 | NM_003507 | FZD7    | 1.1691 | 0.0383 | 1.1388   | 8.5102   | 1.7645  | 0.3099 | 0.027   | 0.3901 | 1.3379   | 0.5267 |
| Hs.80409  | NM_001924 | GADD45A | 0.7505 | UD     | UD       | UD       | UD      | UD     | UD      | UD     | UD       | UD     |
| Hs.1573   | NM_000557 | GDF5    | 1.0758 | 0.38   | 2.2      | 0.3509   | UD      | 0.0786 | 0.0033  | 0.0269 | 0.186    | UD     |
| Hs.248114 | NM_000514 | GDNF    | 0.0567 | 0.0007 | 0.1016   | 0.5832   | UD      | 0.0634 | 0.0017  | UD     | 0.4644   | UD     |
| Hs.74471  | NM_000165 | GJA1    | UD     | 0.826  | 150.9026 | UD       | UD      | UD     | 0.0158  | UD     | 1.1647   | UD     |
| Hs.439524 | NM_016426 | GTSE1   | 1.0541 | UD     | 0.5571   | 0.1466   | 0.2382  | 0.404  | 0.7257  | 0.1989 | 0.8827   | 0.7083 |
| Hs.152983 | NM_004507 | HUS1    | 0.9767 | UD     | 1.9132   | UD       | 49.5221 | 0.3796 | 15.7524 | UD     | UD       | UD     |
| Hs.726053 | NM_002166 | ID2     | 2.243  | 0.8375 | 1.7869   | 1.1089   | 0.4411  | 0.4465 | UD      | UD     | 0.1088   | 0.6902 |
| Hs.160562 | NM_000618 | IGF1    | 0.0984 | 0.0482 | UD       | 0.5356   | UD      | 0.1004 | 0.0069  | UD     | 0.8606   | UD     |
| Hs.716962 | NM_000612 | IGF2    | UD     | 1.7953 | UD       | 0.2315   | UD      | UD     | UD      | UD     | 0.4774   | UD     |
| Hs.654458 | NM_000600 | IL6     | UD     | UD     | UD       | UD       | UD      | 0.1029 | 0.0074  | UD     | 1.8661   | UD     |
| Hs.471508 | NM_005544 | IRS1    | UD     | 0.0288 | UD       | 7.8309   | UD      | UD     | UD      | UD     | 1.1647   | UD     |
| Hs.626544 | NM_000214 | JAG1    | 0.2262 | 0.0677 | 0.2769   | 0.1296   | 0.0302  | 0.5548 | 0.0124  | 0.4575 | 1.7573   | 1.7471 |
| Hs.508234 | NM_001730 | KLF5    | UD     | 0.1138 | UD       | UD       | UD      | UD     | UD      | UD     | 1.1647   | UD     |
| Hs.300559 | NM_014708 | KNTC1   | 0.8803 | 3.0189 | 0.95     | 1.0792   | 0.7792  | 0.9091 | 0.863   | 0.366  | 1.014    | 1.3036 |
| Hs.594238 | NM_002266 | KPNA2   | 0.9767 | UD     | UD       | UD       | UD      | UD     | UD      | UD     | UD       | UD     |
| Hs.743478 | NM_016269 | LEF1    | 0.0535 | 0.0363 | 0.1086   | 0.0651   | 0.4861  | 0.13   | 0.015   | UD     | 0.4108   | 0.7474 |
| Hs.162757 | NM_002332 | LRP1    | 0.422  | 0.0014 | 0.0057   | 184.7186 | 1.7892  | 0.2813 | 0.0059  | UD     | 4.7349   | 0.2689 |
| Hs.591697 | NM_002358 | MAD2L1  | 1.0614 | 1.0454 | 0.725    | 0.5212   | 0.4353  | 0.4097 | 0.6632  | 0.4601 | 0.9266   | 0.4974 |
| Hs.19400  | NM_006341 | MAD2L2  | 0.9767 | UD     | UD       | 0.2952   | 2.8284  | UD     | 1.1388  | 0.7792 | UD       | UD     |
| Hs.477481 | NM_004526 | MCM2    | 0.16   | UD     | 0.3753   | UD       | 0.2872  | 0.5596 | 0.6231  | 0.2031 | 0.0928   | 0.0355 |
| Hs.179565 | NM_002388 | MCM3    | 0.1255 | UD     | 0.084    | UD       | 0.5396  | 0.3849 | 0.0379  | 0.2415 | 0.0266   | 7.7409 |
| Hs.460184 | NM_005914 | MCM4    | 0.8803 | 0.286  | 0.8156   | 1.0943   | 0.2466  | 0.3304 | 1.4717  | 0.7684 | 1.057    | 0.8025 |
| Hs.517582 | NM_006739 | MCM5    | 0.7989 | 2.7019 | 0.725    | 0.5035   | 0.1233  | 0.2487 | 0.7887  | 0.0866 | 1.1251   | 0.7133 |
| Hs.733536 | NM_002392 | MDM2    | 0.8742 | 0.4245 | 0.9369   | 0.2192   | 1.1728  | 2.9949 | 1.0774  | 2.9282 | 3.1602   | 1.0371 |
| Hs.132966 | NM_000245 | MET     | 0.0321 | 0.04   | 0.0656   | 0.0541   | UD      | 0.1469 | UD      | UD     | 0.0766   | UD     |
| Hs.80976  | NM_002417 | MKI67   | 0.7402 | UD     | 0.6012   | 0.1895   | 0.3186  | 0.4771 | 0.7565  | 0.2892 | 0.1022   | 0.9091 |
| Hs.513617 | NM_004530 | MMP2    | 0.09   | 0.0669 | UD       | 0.0738   | UD      | 0.0601 | 0.0079  | UD     | 5.278    | UD     |
| Hs.2256   | NM_002423 | MMP7    | 0.7098 | 0.5841 | 0.1505   | 0.2283   | 0.1947  | 0.6752 | 0.001   | 1.1423 | 0.8868   | 0.044  |
| Hs.297413 | NM_004994 | MMP9    | 0.0337 | 0.0539 | 0.0484   | 0.0311   | 0.3013  | 0.0222 | 0.0017  | 0.2683 | 0.0913   | 1.7053 |
| Hs.509523 | NM_002431 | MNAT1   | 0.9369 | UD     | 0.5848   | 0.0954   | 0.8645  | 0.1607 | 0.9122  | 0.3585 | 1.2924   | 1.3779 |
| Hs.192649 | NM_005590 | MRE11A  | 0.9767 | UD     | UD       | UD       | UD      | UD     | 1.9554  | 1.3379 | UD       | UD     |
| Hs.202453 | NM_002467 | MYC     | UD     | 0.5301 | UD       | 0.2551   | 0.0144  | 1.154  | 0.4531  | 0.3396 | 3.4263   | 1.21   |
| Hs.635882 | NM_024865 | NANOG   | 1.032  | 3.4444 | 3.4046   | 3.6787   | UD      | UD     | UD      | UD     | 0.3353   | UD     |
| Hs.492208 | NM_002485 | NBN     | 1.1297 | 0.1343 | 0.8621   | UD       | 0.483   | 0.8781 | 1.0479  | 1.366  | 1.0718   | 0.7751 |
| Hs.21422  | NM_005010 | NRCAM   | UD     | 0.2065 | UD       | 0.3207   | UD      | 0.088  | 0.0047  | 0.0826 | 1.2311   | UD     |
| Hs.653996 | NM_003873 | NRP1    | 0.3725 | 1.6751 | UD       | UD       | 3.225   | 0.6127 | UD      | 0.7589 | 6.3203   | 0.3276 |
| Hs.712776 | NM_006180 | NTRK2   | UD     | UD     | UD       | UD       | UD      | UD     | UD      | UD     | 1.1647   | UD     |
| Hs.74615  | NM_006206 | PDGFRA  | 0.601  | 5.1846 | 0.9379   | 0.5209   | UD      | 0.1124 | 0.0033  | UD     | 0.4741   | 0.5396 |
| Hs.738484 | NM_000325 | PITX2   | UD     | UD     | UD       | UD       | UD      | UD     | UD      | UD     | 1.1647   | UD     |
| Hs.466871 | NM_002659 | PLAUR   | 1.2883 | 3.9841 | 1.6673   | 0.4861   | 6.2303  | 0.0777 | 0.1464  | 0.116  | 0.459    | 4.84   |
| Hs.249184 | NM_002701 | POU5F1  | UD     | UD     | UD       | 4.4358   | UD      | UD     | UD      | UD     | 1.1647   | UD     |
| Hs.619002 | NM_003713 | PPAP2B  | UD     | UD     | UD       | UD       | 0.3163  | 0.1387 | 0.0157  | 0.3492 | 2.7195   | 0.7658 |
| Hs.696032 | NM_006238 | PPARD   | UD     | UD     | 0.0939   | UD       | UD      | UD     | UD      | UD     | 1.1647   | UD     |
| Hs.494538 | NM_000264 | PTCH1   | UD     | 0.0946 | 0.6188   | 0.0229   | UD      | UD     | UD      | 0.0094 | 0.3008   | UD     |

**Supplementary Table 4**

|           |           |         |        |        |        |              |              |        |        |             |        |        |
|-----------|-----------|---------|--------|--------|--------|--------------|--------------|--------|--------|-------------|--------|--------|
| Hs.196384 | NM_000963 | PTGS2   | 0.5379 | 8.0235 | UD     | 0.1615       | UD           | 0.0526 | 0.0067 | 0.0975      | 0.3057 | UD     |
| Hs.38114  | NM_002853 | RAD1    | 1.1455 | UD     | 0.7351 | UD           | 0.8645       | 0.6384 | 0.925  | 0.5946      | 1.0867 | UD     |
| Hs.16184  | NM_002873 | RAD17   | 0.9767 | UD     | UD     | UD           | UD           | UD     | UD     | UD          | UD     | UD     |
| Hs.631709 | NM_002875 | RAD51   | 0.0778 | 7.1305 | 0.1273 | UD           | 0.6029       | 0.9028 | 0.7157 | 0.2031      | 0.6974 | 1.0299 |
| Hs.655354 | NM_004584 | RAD9A   | 0.5494 | UD     | 1.43   | UD           | 0.2415       | 1.1192 | 1.1231 | 0.5824      | 0.8351 | 1.0886 |
| Hs.408528 | NM_000321 | RB1     | 0.8864 | UD     | 1.1777 | UD           | 0.4475       | 0.7539 | 0.9576 | 0.3015      | 1.3195 | 0.7539 |
| Hs.546282 | NM_002894 | RBBP8   | 1.0112 | 0.0862 | 1.7605 | 0.3164       | 2.2974       | 1.0157 | 0.9122 | 0.3035      | 1.1728 | 1.0157 |
| Hs.207745 | NM_002895 | RBL1    | 0.7989 | 0      | 1.1859 | UD           | 0.6926       | UD     | 1.2462 | 0.8526      | UD     | UD     |
| Hs.513609 | NM_005611 | RBL2    | 1.0762 | 0.1343 | 1.9534 | UD           | 0.7371       | 1.2248 | 1.1388 | 0.5864      | 1.5263 | 0.8137 |
| Hs.535845 | NM_004348 | RUNX2   | 0.0435 | 0.0128 | 0.06   | 0.171        | 0.1804       | 0.1202 | 0.0118 | UD          | 0.159  | 2.7606 |
| Hs.269898 | NM_013376 | SERTAD1 | 1.2193 | 0.1343 | 1.2977 | UD           | 0.6113       | 0.2557 | 1.3264 | 0.9075      | UD     | 0.7435 |
| Hs.481022 | NM_003013 | SFRP2   | UD     | 0.1162 | UD     | 5.8937       | UD           | UD     | 0.0232 | UD          | 1.1647 | UD     |
| Hs.633506 | NM_005982 | SIX1    | UD     | UD     | UD     | UD           | 0.0785       | 0.1116 | 0.0224 | UD          | 0.7055 | 3.9862 |
| Hs.23348  | NM_005983 | SKP2    | 0.761  | UD     | 0.9434 | UD           | 0.1406       | 1.6161 | 1.0924 | 0.4033      | 1.5583 | 0.6609 |
| Hs.437846 | NM_005631 | SMO     | UD     | 0.4844 | 8.739  | UD           | UD           | 0.0856 | 0.0158 | UD          | 3.1602 | UD     |
| Hs.732963 | NM_003106 | SOX2    | UD     | UD     | UD     | UD           | 132481<br>84 | 0.0778 | 0.0038 | 0.1209      | 1.0994 | UD     |
| Hs.647409 | NM_000346 | SOX9    | UD     | UD     | UD     | UD           | 0.2397       | 0.1312 | 0.0253 | 0.4938      | 0.7882 | 3.5677 |
| Hs.209983 | NM_005563 | STMN1   | 0.95   | UD     | 0.3406 | UD           | 0.2872       | 0.3957 | 0.5577 | 0.155       | 0.5664 | 0.6428 |
| Hs.742027 | NM_003181 | T       | UD     | UD     | UD     | UD           | 29.026<br>3  | UD     | UD     | 0.0584      | 1.1647 | UD     |
| Hs.605153 | NM_003199 | TCF4    | UD     | UD     | UD     | 0.0332       | UD           | 0.4313 | 0.0358 | UD          | 0.3407 | 0.3523 |
| Hs.573153 | NM_003202 | TCF7    | UD     | UD     | UD     | 1.3279       | 0.0665       | 0.1034 | 0.0747 | 0.2135      | 0.5359 | 6.8448 |
| Hs.516297 | NM_031283 | TCF7L1  | UD     | 1.7829 | UD     | UD           | UD           | 0.1586 | 0.0341 | UD          | 1.1647 | UD     |
| Hs.593995 | NM_030756 | TCF7L2  | 1.1451 | 0.4396 | UD     | 0.5984       | 1.6237       | 0.3128 | 0.0664 | 0.4803      | 1.1408 | 2.6208 |
| Hs.79353  | NM_007111 | TFDP1   | 0.6399 | UD     | UD     | 0.1183       | 0.6974       | UD     | UD     | UD          | UD     | UD     |
| Hs.379018 | NM_006286 | TFDP2   | 1.5011 | UD     | UD     | UD           | 0.7022       | 0.2289 | 0.8751 | 0.6285      | 1.9185 | 0.5519 |
| Hs.592317 | NM_003239 | TGFB3   | UD     | UD     | UD     | 0            | 0.678        | 0.1557 | 0.0042 | 0.6426      | 0.0256 | 0.2963 |
| Hs.689805 | NM_005077 | TLE1    | UD     | UD     | 2.1103 | UD           | 0.9008       | 1.3013 | 0.0314 | 0.1652      | 5.7624 | 0.5824 |
| Hs.740601 | NM_000546 | TP53    | 0.0869 | 0      | 0.1452 | 4.06E+<br>09 | 0.1672       | 0.6252 | 0.023  | 17.387<br>8 | 0.0684 | 0.0333 |
| Hs.644998 | NM_000474 | TWIST1  | UD     | UD     | UD     | UD           | UD           | 0.0534 | 0.2346 | 0.0288      | 0.4698 | UD     |
| Hs.73793  | NM_003376 | VEGFA   | UD     | UD     | UD     | UD           | 3.225        | 1.2483 | 0.0525 | 0.1652      | 3.6808 | 3.3404 |
| Hs.249441 | NM_003390 | WEE1    | 0.9767 | UD     | UD     | 0.1119       | 1.5911       | UD     | 1.1789 | 0.8066      | UD     | UD     |
| Hs.492974 | NM_003882 | WISP1   | UD     | UD     | UD     | UD           | 327324<br>7  | UD     | UD     | UD          | 1.1647 | UD     |
| Hs.592145 | NM_003881 | WISP2   | UD     | UD     | UD     | UD           | UD           | UD     | UD     | UD          | 1.1647 | UD     |
| Hs.336930 | NM_033131 | WNT3A   | UD     | UD     | UD     | UD           | UD           | UD     | UD     | UD          | 1.1647 | UD     |
| Hs.643085 | NM_003392 | WNT5A   | UD     | UD     | UD     | UD           | UD           | UD     | UD     | UD          | 1.1647 | UD     |
| Hs.149504 | NM_003395 | WNT9A   | UD     | UD     | UD     | 0.7574       | UD           | 0.1066 | 0.0082 | UD          | 0.9659 | UD     |

**Supplementary Table 5**

| Unigene   | Refseq       | Symbol   | C-59 vs Vehicle |          | ICG001 vs Vehicle |          |
|-----------|--------------|----------|-----------------|----------|-------------------|----------|
|           |              |          | Fold change     | P value  | Fold change       | P value  |
| Rn.154810 | NM_133401    | Abcb1a   | -2.5555         | 0.075025 | -6.5847           | 0.000145 |
| Rn.91370  | NM_013149    | Ahr      | -3.7307         | 0.004575 | -7.0687           | 0.000229 |
| Rn.119611 | NM_199115    | Angptl4  | -15.3069        | 0.018568 | -1.251            | 0.667996 |
| Rn.41192  | NM_001044249 | Antxr1   | -10.2279        | 0.000916 | -11.2624          | 0.000202 |
| Rn.162212 | NM_024355    | Axin2    | -5.6351         | 0.000085 | -3.9352           | 0.000081 |
| Rn.9722   | NM_013414    | Bglap    | 2.093           | 0.514485 | -2.2712           | 0.256089 |
| Rn.54471  | NM_022274    | Birc5    | -3.5974         | 0.038852 | -2.972            | 0.024898 |
| Rn.10318  | NM_012827    | Bmp4     | -563.3071       | 0.019822 | -6.4925           | 0.020684 |
| Rn.21800  | NM_001007148 | Btrc     | -2.8143         | 0.041023 | -6.8961           | 0.000007 |
| Rn.206369 | NM_175595    | Cacna2d3 | -2.0131         | 0.341728 | -5.6078           | 0.152076 |
| Rn.22279  | NM_171992    | Ccnd1    | -2.9254         | 0.015406 | -3.4946           | 0.001006 |
| Rn.96083  | NM_022267    | Ccnd2    | -1.8783         | 0.168274 | -2.8215           | 0.01193  |
| Rn.1120   | NM_012924    | Cd44     | -5.4969         | 0.013002 | -5.1519           | 0.010769 |
| Rn.1303   | NM_031334    | Cdh1     | -1.2544         | 0.869302 | -4.9569           | 0.000037 |
| Rn.48717  | NM_031550    | Cdkn2a   | -3.9343         | 0.115286 | -1.8857           | 0.190719 |
| Rn.10818  | NM_017358    | Cdon     | -1.6889         | 0.253346 | -2.6724           | 0.000172 |
| Rn.202620 | NM_013154    | Cebpd    | 1.855           | 0.319229 | -1.7437           | 0.370655 |
| Rn.17145  | NM_022266    | Ctgf     | -8.4334         | 0.008115 | -6.5211           | 0.003577 |
| Rn.3236   | NM_053332    | Cubn     | -3.3681         | 0.277453 | -3.5986           | 0.223937 |
| Rn.161784 | NM_024159    | Dab2     | -5.0377         | 0.000267 | -4.0919           | 0.000095 |
| Rn.214343 | NM_001106350 | Dkk1     | -7.7469         | 0.290882 | -13.7096          | 0.234986 |
| Rn.14547  | NM_053744    | Dlk1     | -11.4672        | 0.207758 | -3.8784           | 0.192736 |
| Rn.217077 | NM_001012205 | Dpp10    | -9.8226         | 0.390508 | -24.203           | 0.287647 |
| Rn.44398  | NM_017089    | Efnb1    | -1.6724         | 0.064258 | -1.8081           | 0.024947 |
| Rn.37227  | NM_031507    | Egfr     | -1.2645         | 0.817566 | -4.4325           | 0.02453  |
| Rn.9096   | NM_012551    | Egr1     | -14.2242        | 0.14966  | -5.7111           | 0.133359 |
| Rn.20403  | NM_057104    | Enpp2    | 1.2958          | 0.239544 | 1.1784            | 0.436179 |
| Rn.164554 | NM_001107107 | Ets2     | -1.4015         | 0.869072 | -3.6262           | 0.000048 |
| Rn.64492  | NM_023961    | Fgf20    | -466.8918       | 0.195369 | -151.0042         | 0.145462 |
| Rn.81223  | NM_053809    | Fgf4     | -150.6731       | 0.245903 | -79.0546          | 0.191307 |
| Rn.98842  | NM_022182    | Fgf7     | -3.7915         | 0.011545 | -3.6624           | 0.005399 |
| Rn.25174  | NM_012952    | Fgf9     | -15.7554        | 0.006404 | -8.3038           | 0.004564 |

**Supplementary Table 5**

|           |              |        |          |          |          |          |
|-----------|--------------|--------|----------|----------|----------|----------|
| Rn.1604   | NM_019143    | Fn1    | -1.8091  | 0.001832 | -2.4112  | 0        |
| Rn.11306  | NM_012953    | Fosl1  | -7.8369  | 0.114307 | -20.905  | 0.092314 |
| Rn.162557 | NM_012561    | Fst    | 1.0297   | 0.935657 | -2.4196  | 0.085727 |
| Rn.127822 | XM_001066344 | Gdf5   | -38.6379 | 0.262325 | -77.4635 | 0.20496  |
| Rn.53970  | NM_019139    | Gdnf   | -1.9603  | 0.164434 | -3.425   | 0.069475 |
| Rn.10346  | NM_012567    | Gja1   | 1.2973   | 0.184123 | -1.3598  | 0.18748  |
| Rn.3272   | NM_013060    | Id2    | -4.556   | 0.000247 | -5.8962  | 0.000025 |
| Rn.6282   | NM_178866    | Igf1   | 2.2877   | 0.02751  | -1.6831  | 0.011408 |
| Rn.118681 | NM_031511    | Igf2   | -17.1715 | 0.08905  | -6.5181  | 0.075083 |
| Rn.9873   | NM_012589    | Il6    | -10.2931 | 0.011367 | -4.9455  | 0.163558 |
| Rn.10476  | NM_012969    | Irs1   | -4.0286  | 0.000201 | -3.4337  | 0.000113 |
| Rn.88804  | NM_019147    | Jag1   | -6.8185  | 0.006921 | -7.5341  | 0.002846 |
| Rn.8954   | NM_053394    | Klf5   | -4.5298  | 0.028456 | -6.7386  | 0.017504 |
| Rn.21926  | NM_130429    | Lef1   | -18.9432 | 0.175831 | -13.3624 | 0.132224 |
| Rn.22436  | XM_243524    | Lrp1   | -2.6733  | 0.041438 | -4.0086  | 0.000083 |
| Rn.10617  | NM_031517    | Met    | -8.448   | 0.000502 | -3.2992  | 0.000715 |
| Rn.6422   | NM_031054    | Mmp2   | -1.25    | 0.530223 | -1.9419  | 0.022118 |
| Rn.10282  | NM_012864    | Mmp7   | -1.3902  | 0.330346 | -4.1606  | 0.172987 |
| Rn.10209  | NM_031055    | Mmp9   | -5.3219  | 0.008932 | -18.9542 | 0.001417 |
| Rn.12072  | NM_012603    | Myc    | -28.3173 | 0.00005  | -8.8465  | 0.000021 |
| Rn.124668 | NM_001100781 | Nanog  | -98.379  | 0.44224  | -60.3707 | 0.384795 |
| Rn.10691  | NM_013150    | Nrcam  | -1.5434  | 0.262963 | -2.509   | 0.013946 |
| Rn.10815  | NM_145098    | Nrp1   | -4.0801  | 0.009896 | -1.8354  | 0.052216 |
| Rn.11246  | NM_012731    | Ntrk2  | -35.3902 | 0.236826 | -13.1481 | 0.199338 |
| Rn.55127  | NM_012802    | Pdgfra | -9.4498  | 0.000597 | -1.9209  | 0.028372 |
| Rn.17591  | NM_019334    | Pitx2  | -9.4552  | 0.38671  | -5.0076  | 0.334277 |
| Rn.82711  | NM_017350    | Plaur  | -4.2583  | 0.004162 | -9.1882  | 0.000013 |
| Rn.161748 | NM_001009178 | Pou5f1 | -4.4674  | 0.133788 | -6.5999  | 0.073488 |
| Rn.12038  | NM_138905    | Ppap2b | 3.7487   | 0.424514 | 2.1778   | 0.276632 |
| Rn.96181  | NM_013141    | Ppard  | -24.8088 | 0.00007  | -14.348  | 0.000018 |
| Rn.105585 | NM_053566    | Ptch1  | -5.4212  | 0.001361 | -3.9044  | 0.000873 |
| Rn.44369  | NM_017232    | Ptgs2  | -4.017   | 0.061162 | -6.131   | 0.020773 |
| Rn.214214 | NM_053470    | Runx2  | -5.3869  | 0.000785 | -8.047   | 0.000108 |
| Rn.102416 | NM_001100700 | Sfrp2  | -3.5213  | 0.286129 | -2.3491  | 0.250492 |

**Supplementary Table 5**

|           |              |        |          |          |          |          |
|-----------|--------------|--------|----------|----------|----------|----------|
| Rn.23396  | NM_053759    | Six1   | -64.1604 | 0.334918 | -17.043  | 0.284974 |
| Rn.44429  | NM_012807    | Smo    | -1.6155  | 0.113617 | -3.9681  | 0.004683 |
| Rn.219221 | NM_001109181 | Sox2   | -28.4813 | 0.353291 | -44.5837 | 0.28744  |
| Rn.95086  | XM_001081628 | Sox9   | -8.4431  | 0.00061  | -5.6717  | 0.000212 |
| Rn.218650 | NM_001106209 | T      | -22.346  | 0.406381 | -6.2525  | 0.381353 |
| Rn.33103  | NM_001107865 | Tcf3   | -4.8605  | 0.000408 | -9.8363  | 0.000003 |
| Rn.23354  | NM_053369    | Tcf4   | -2.4914  | 0.09178  | -6.8279  | 0.000105 |
| Rn.106335 | XM_343891    | Tcf7   | -6.4024  | 0.118477 | -7.5063  | 0.068855 |
| Rn.105849 | XM_001054844 | Tcf7l2 | -8.034   | 0.001652 | -11.0587 | 0.000217 |
| Rn.7018   | NM_013174    | Tgfb3  | -2.0926  | 0.133276 | -5.6014  | 0.000143 |
| Rn.6875   | XM_342851    | Tle1   | -2.4571  | 0.01031  | -2.4376  | 0.014902 |
| Rn.161904 | NM_053530    | Twist1 | -2.4051  | 0.328487 | -6.9746  | 0.017812 |
| Rn.1923   | NM_031836    | Vegfa  | -7.7962  | 0.000507 | -17.6156 | 0.000024 |
| Rn.63486  | NM_031716    | Wisp1  | -6.8937  | 0.400341 | -4.4438  | 0.41784  |
| Rn.53991  | NM_031590    | Wisp2  | -2.226   | 0.129883 | -13.8849 | 0.005902 |
| Rn.218621 | NM_001107005 | Wnt3a  | -33.6751 | 0.206538 | -17.1497 | 0.166711 |
| Rn.48749  | NM_022631    | Wnt5a  | -4.7577  | 0.062036 | -2.3291  | 0.083822 |
| Rn.40411  | NM_001105783 | Wnt9a  | -9.0648  | 0.096383 | -4.7167  | 0.080884 |

**Supplementary Table 6**

| <b>Antibodies used in this study</b> |                        |             |
|--------------------------------------|------------------------|-------------|
| <b>Antigen</b>                       |                        |             |
| aSMA                                 | Sigma                  | A2547       |
| Bcl9                                 | AbCam                  | ab37305     |
| BIRC5                                | AbCam                  | ab8228      |
| Ccnd2                                | AbCam                  | ab3085      |
| CD163                                | AbD Serotech           | MCA2311GA   |
| CD68                                 | AbD Serotech           | MCA341R     |
| Ctnnb1                               | BD biosciences         | 610154      |
| Ctnnb1 Active                        | Millipore              | 05-665      |
| GFP                                  | AbCam                  | ab13970     |
| Ki67                                 | Lica                   | 6019624     |
| Krt19                                | Cell Applications Inc  | CP10405     |
| Lef1                                 | Novus Biologicals      | NBP-86960   |
| c-MYC                                | Santa Cruz Biotech Inc | sc-764      |
| Rspo1                                | R&D Systems            | AF3474      |
| Survivin                             | VWR International      | ABCAAB24479 |
| TUNEL                                | Roche                  | 11684795910 |
| Wnt7b                                | Novus Biologicals      | NBP-59564   |
| <b>Primers Used in this study</b>    |                        |             |
| <b>Human</b>                         |                        |             |
| CCND2                                | Qiagen                 | QT00057575  |
| BAX1                                 | Qiagen                 | QT00031192  |
| BIRC5                                | Qiagen                 | QT00081186  |
| LEF1                                 | Qiagen                 | QT00021133  |
| WNT10A                               | Qiagen                 | QT00205632  |
| WNT7B                                | Qiagen                 | QT00088354  |
| <b>Mouse</b>                         |                        |             |
| Lef1                                 | Qiagen                 | QT00148834  |
| Axin2                                | Qiagen                 | QT00126539  |
| Wnt7b                                | Qiagen                 | QT00168812  |
| Wnt10a                               | Qiagen                 | QT00110089  |
| <b>Rat</b>                           |                        |             |
| Axin2                                | Qiagen                 | QT00184184  |
| Bcl9                                 | Qiagen                 | QT00390383  |
| Birc5                                | Qiagen                 | QT00416010  |
| Ccnd2                                | Qiagen                 | QT00432705  |
| Ccne                                 | Qiagen                 | QT01625036  |
| Porcn                                | Qiagen                 | QT00421078  |
| Rnf43                                | Qiagen                 | QT00438865  |
| Rspo1                                | Qiagen                 | QT01295728  |
| Wn7tb                                | Qiagen                 | QT00454965  |
| Wnt10a                               | Qiagen                 | QT00379953  |
